# Supplementary material for: O-Benzoxazolyl imidates as versatile glycosyl donors for chemical glycosylation
Source: Royal Society of Chemistry journal article supplement (doi:10.1039/c3ob40667a), 2013-01-01
Supplement: c3ob40667a.pdf [file c3ob40667a.pdf]

## **Supporting information**

### **O-Benzoxazolyl imidates as versatile glycosyl donors for chemical glycosylation**

*Swati S. Nigudkar,<sup>a</sup> Archana R. Parameswar,<sup>a</sup> Papapida Pornsuriyasak,<sup>a</sup> Keith J. Stine,<sup>a,b</sup>  
and Alexei V. Demchenko<sup>a,\*</sup>*

<sup>a</sup> - *Department of Chemistry and Biochemistry and*

<sup>b</sup> – *Center for Nanoscience,*

*University of Missouri-St. Louis, One University Boulevard*

*St. Louis, Missouri 63121, USA*

*E-mail: [demchenkoa@umsl.edu](mailto:demchenkoa@umsl.edu)*

#### **Content:**

|                               |     |
|-------------------------------|-----|
| Table 1S: UV data             | S2  |
| Synthesis of oligosaccharides | S3  |
| Spectra                       | S5  |
| References                    | S29 |

**Table 1S.** Comparative UV data for O, N and S-linked derivatives

| Entry | Compound                                                                            | Band 1<br>max (nm) | Band 2<br>max (nm) | Ref.         |
|-------|-------------------------------------------------------------------------------------|--------------------|--------------------|--------------|
| 1     | 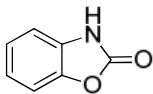   | 275                | -                  | This work    |
| 2     | 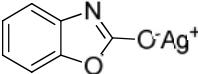   | 274                | 280                | This work    |
| 3     | 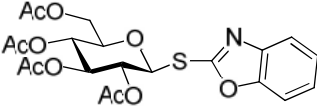   | 280                | 290                | <sup>1</sup> |
| 4     | 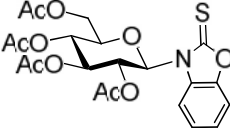   | 300                | --                 | <sup>1</sup> |
| 5     | 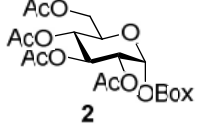   | 273                | 279                | This work    |
| 6     | 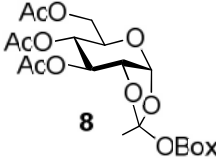  | 274                | 280                | This work    |
| 7     | 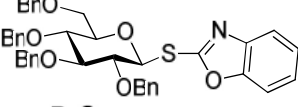 | 280                | 290                | <sup>2</sup> |
| 8     | 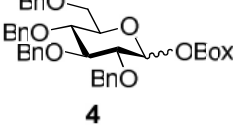 | 270                | 276                | This work    |

### Synthesis of oligosaccharides:

**Methyl 6-O-(2,3,4,6-tetra-O-benzyl- -D-glucopyranosyl)-2,3,4-tri-O-benzyl- -D-glucopyranoside (19).** The title compound was obtained from donor **4** and acceptor **15** by Method C in 95% yield ( / = 1/4.0) as a white amorphous solid. The analytical data for the title compound **19** was in accordance to that reported previously.<sup>3</sup>

**Methyl 4-O-(2,3,4,6-tetra-O-benzyl- -D-glucopyranosyl)-2,3,6-tri-O-benzyl- -D-glucopyranoside (20).** The title compound was obtained from donor **4** and acceptor **16** by Method C in 89% yield ( / = 1/1.5) as a white amorphous solid. The analytical data for the title compound was in accordance to that reported previously.<sup>4</sup>

**Methyl 3-O-(2,3,4,6-tetra-O-benzyl- -D-glucopyranosyl)-2,4,6-tri-O-benzyl- -D-glucopyranoside (21).** The title compound was obtained from donor **4** and acceptor **17** by Method C in 95% yield ( / = 1/1.0) as a white amorphous solid. The analytical data for the title compound was in accordance to that reported previously.<sup>5</sup>

**Methyl 2-O-(2,3,4,6-tetra-O-benzyl- -D-glucopyranosyl)-3,4,6-tri-O-benzyl- -D-glucopyranoside (22).** The title compound was obtained from donor **4** and acceptor **18** by Method C in 92% yield ( / = 1/2.4) as a white amorphous solid. The analytical data for the title compound was in accordance to that reported previously.<sup>6</sup>

**Methyl 2,3,4-tri-O-benzyl-6-O-(2,3,4,6-tetra-O-benzyl-D-mannopyranosyl)- -D-glucopyranoside (23).** The title compound was obtained from donor **4** and acceptor **15** by Method C in 93% yield ( / = 2.9/1) as a white amorphous solid. The title compound was reported previously<sup>7</sup> and its spectra is provided below

**Methyl 2,3,6-tri-O-benzyl-4-O-(2,3,4,6-tetra-O-benzyl- -D-mannopyranosyl)- -D-glucopyranoside (24).** The title compound was obtained from donor **4** and acceptor **16** by Method C in 91% yield ( only) as a white amorphous solid. The title compound was reported previously<sup>8</sup> and its spectra is provided below

**Methyl 2,4,6-tri-O-benzyl-3-O-(2,3,4,6-tetra-O-benzyl- -D-mannopyranosyl)- -D-glucopyranoside (25).** The title compound was obtained from donor **4** and acceptor **17** by Method C in 90% yield ( only) as a white amorphous solid. Compound **25** was reported previously<sup>9</sup> and its spectra is provided below.

**Methyl 3,4,6-tri-O-benzyl-2-O-(2,3,4,6-tetra-O-benzyl- -D-mannopyranosyl)- -D-glucopyranoside (26).** The title compound was obtained from donor **4** and acceptor **18** by Method C in 94% yield ( only) as a white amorphous solid. The title compound was reported previously<sup>6</sup> and its spectra is provided below

**Methyl 6-O-(2,3,4,6-tetra-O-acetyl- -D-glucopyranosyl)-2,3,4-tri-O-benzyl- -D-glucopyranoside (27).** The title compound was obtained from donor **2** and acceptor **15** by Method D in 97% yield ( only) as a white amorphous solid. The analytical data for the title compound was essentially the same as reported previously.<sup>6</sup>

**Methyl 4-O-(2,3,4,6-tetra-O-acetyl- -D-glucopyranosyl)-2,3,6-tri-O-benzyl- -D-glucopyranoside (28).** The title compound was obtained from donor **2** and acceptor **16** by Method D in 97% yield ( only) as a white amorphous solid. The analytical data for the title compound was essentially the same as reported previously.<sup>10</sup>

**Methyl 6-O-(2,3,4,6-tetra-O-benzoyl- -D-glucopyranosyl)-2,3,4-tri-O-benzyl- -D-glucopyranoside (29).** The title compound was obtained from donor **10** and acceptor **15** by

Method C in 89% yield (only) as a white amorphous solid. The analytical data for the title compound was essentially the same as reported previously.<sup>11</sup>

**Methyl 4-O-(2,3,4,6-tetra-O-benzoyl- -D-glucopyranosyl)-2,3,6-tri-O-benzyl- -D-glucopyranoside (30).** The title compound was obtained from donor **10** and acceptor **16** by Method C in 88% yield (only) as a white amorphous solid. The analytical data for the title compound was essentially the same as reported previously.<sup>11</sup>

**Methyl 3-O-(2,3,4,6-tetra-O-benzoyl- -D-glucopyranosyl)-2,4,6-tri-O-benzyl- -D-glucopyranoside (31).** The title compound was obtained from donor **10** and acceptor **17** by Method C in 88% yield (only) as a white amorphous solid. The analytical data for the title compound was essentially the same as reported previously.<sup>12</sup>

**Methyl 2-O-(2,3,4,6-tetra-O-benzoyl- -D-glucopyranosyl)-3,4,6-tri-O-benzyl- -D-glucopyranoside (32).** The title compound was obtained from donor **10** and acceptor **18** by Method C in 87% yield (only) as a white amorphous solid. The analytical data for the title compound was essentially the same as reported previously.<sup>13</sup>

**Methyl 6-O-(2,3,4,6-tetra-O-benzoyl- -D-galactopyranosyl)-2,3,4-tri-O-benzyl- -D-glucopyranoside (33).** The title compound was obtained from donor **12** and acceptor **15** by Method C in 83% yield (only) as a white amorphous solid. The analytical data for the title compound was essentially the same as reported previously.<sup>14</sup>

**Methyl 4-O-(2,3,4,6-tetra-O-benzoyl- -D-galactopyranosyl)-2,3,6-tri-O-benzyl- -D-glucopyranoside (34).** The title compound was obtained from donor **12** and acceptor **16** by Method C in 78% yield (only) as a white amorphous solid. The analytical data for the title compound was essentially the same as reported previously.<sup>15</sup>

**Methyl 2,3,4-tri-O-benzyl-6-O-(2,3,4,6-tetra-O-benzyl- -D-mannopyranosyl)- -D-glucopyranoside (35).** The title compound was obtained from donor **14** and acceptor **15** by Method C in 95% yield (only) as a white amorphous solid. The analytical data for the title compound was essentially the same as reported previously.<sup>15</sup>

**Methyl 2,3,6-tri-O-benzyl-4-O-(2,3,4,6-tetra-O-benzyl- -D-mannopyranosyl)- -D-glucopyranoside (36).** The title compound was obtained from donor **14** and acceptor **16** by Method C in 97% yield (only) as a white amorphous solid. The analytical data for the title compound was essentially the same as reported previously.<sup>11</sup>

**Benzoxazolyl 2,3,4,6-tetra-O-acetyl- -D-glucopyranoside (2).**

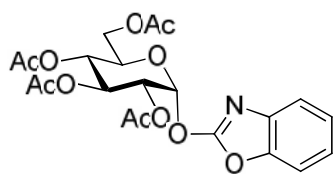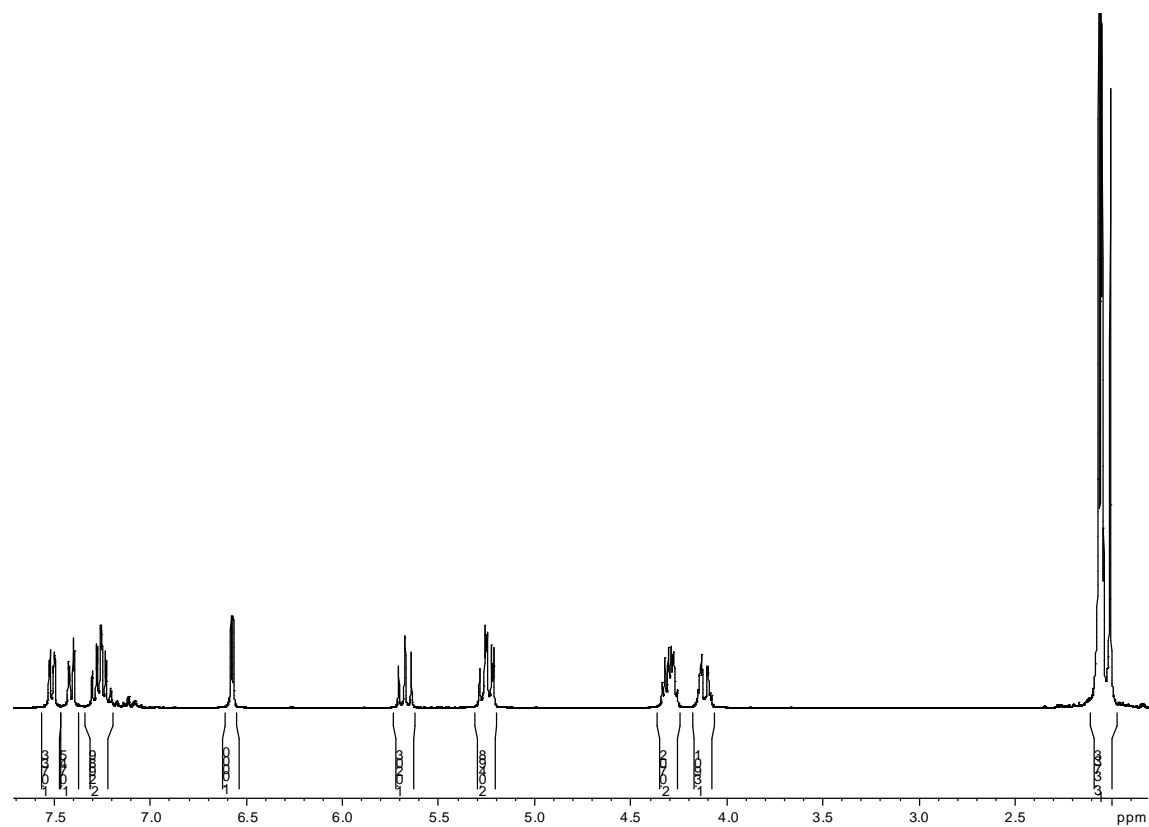

**(<sup>1</sup>H NMR 300 MHz, CDCl<sub>3</sub>)**

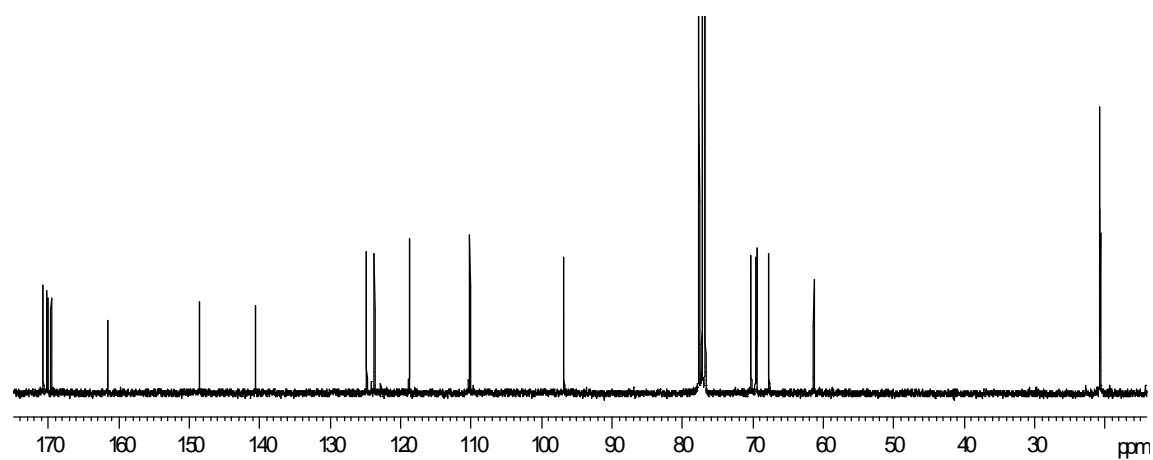

**(<sup>13</sup>C NMR 75 MHz, CDCl<sub>3</sub>)**

**Benzoxazolyl 2,3,4,6-tetra-O-acetyl-  $\beta$ -D-glucopyranoside (2).**

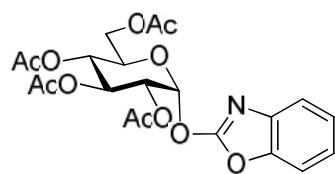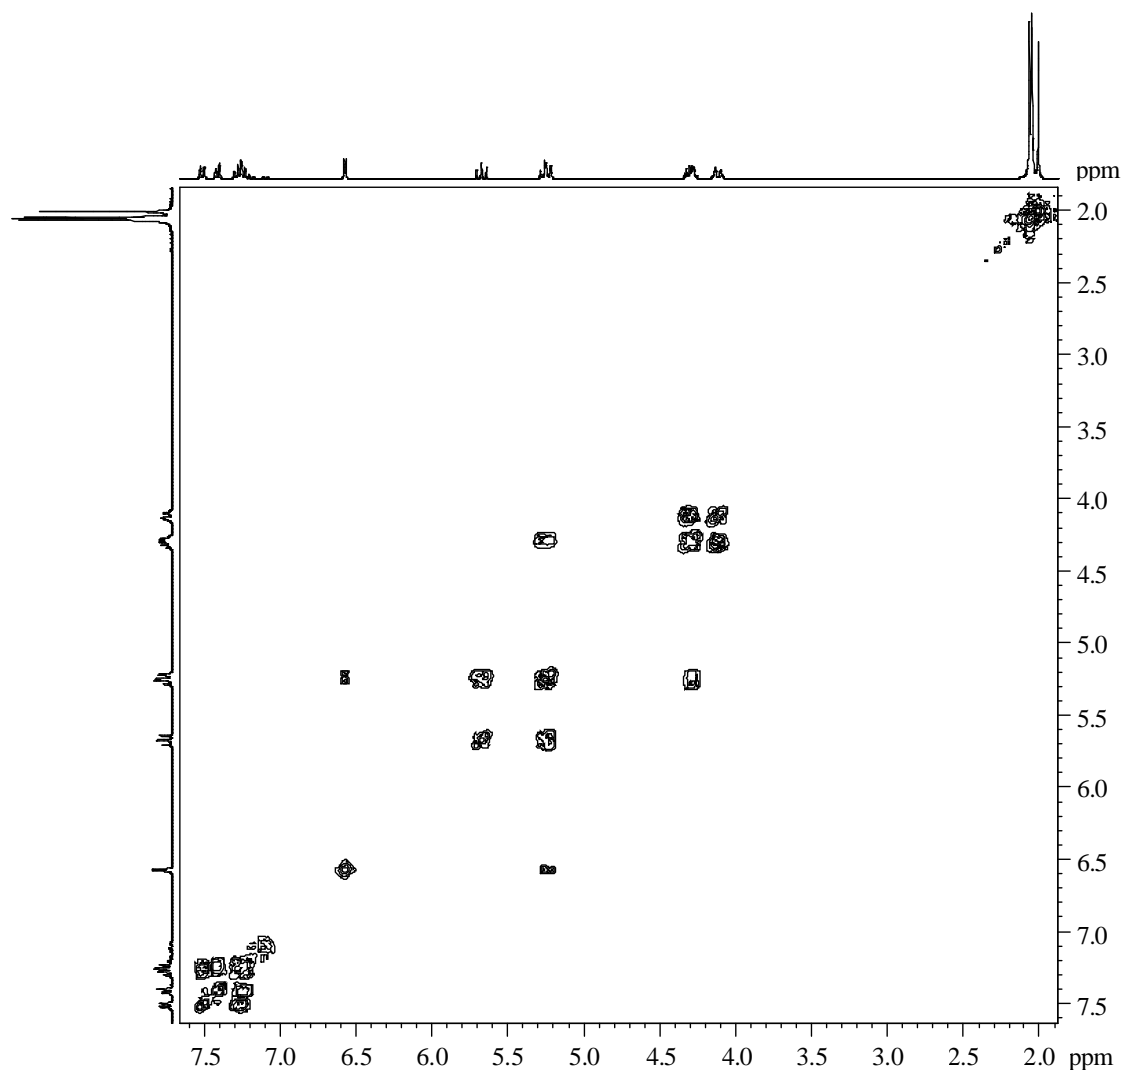

**(2D NMR 300MHz,  $\text{CDCl}_3$ )**

**Benzoxazolyl 2,3,4,6-tetra-O-benzyl- / -D-glucopyranoside (4)**

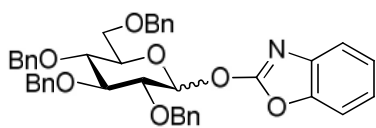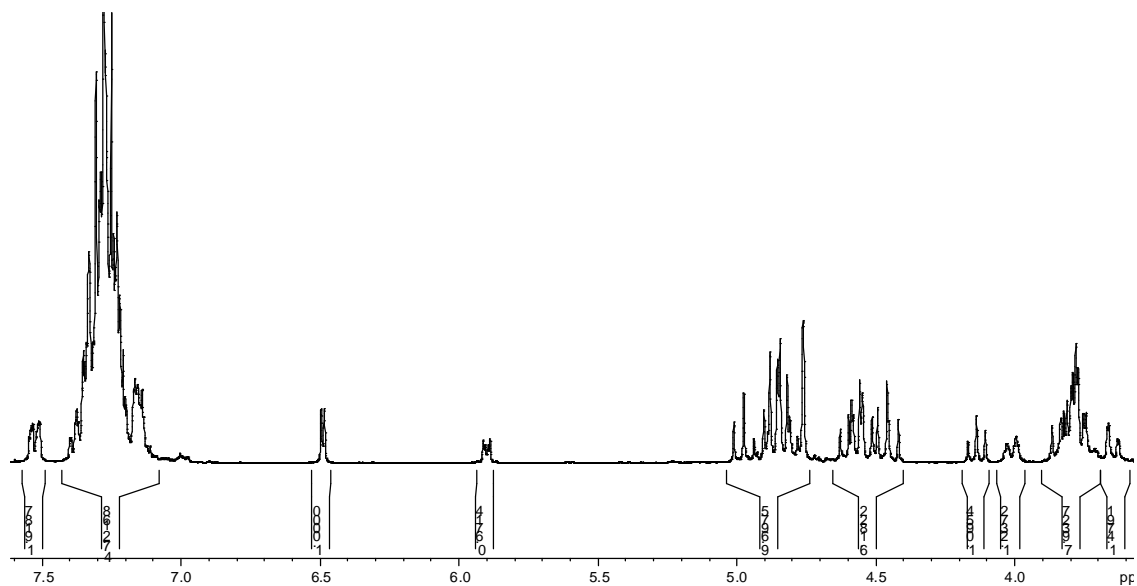

( $^1\text{H}$  NMR 300 MHz,  $\text{CDCl}_3$ )

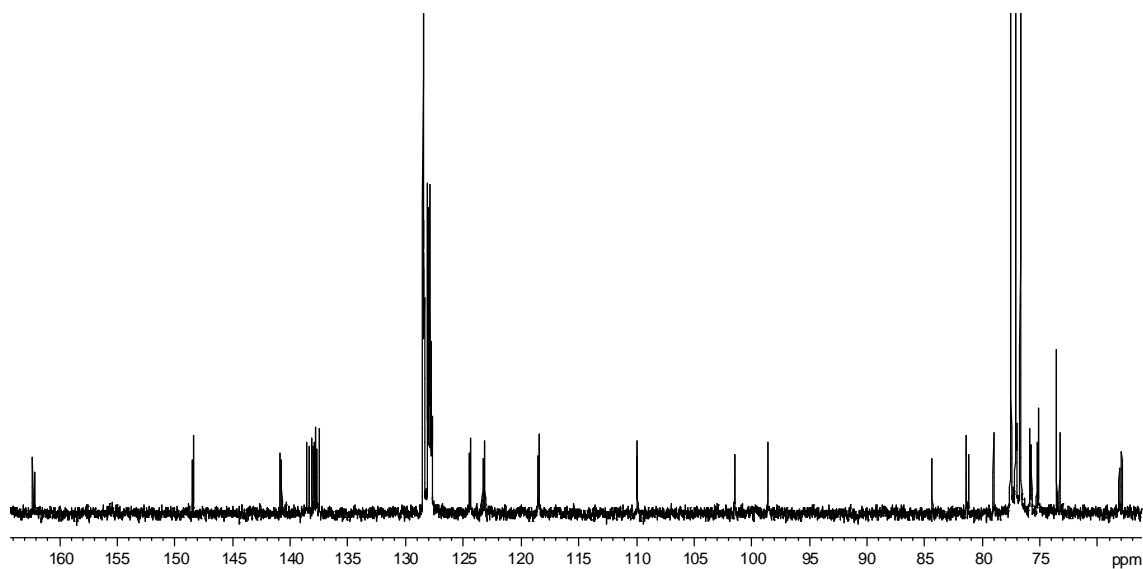

( $^{13}\text{C}$  NMR 75 MHz,  $\text{CDCl}_3$ )

**Benzoxazolyl 2,3,4,6-tetra-O-benzyl- / -D-glucopyranoside (4)**

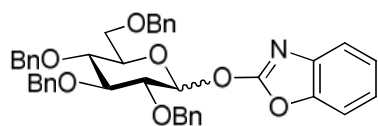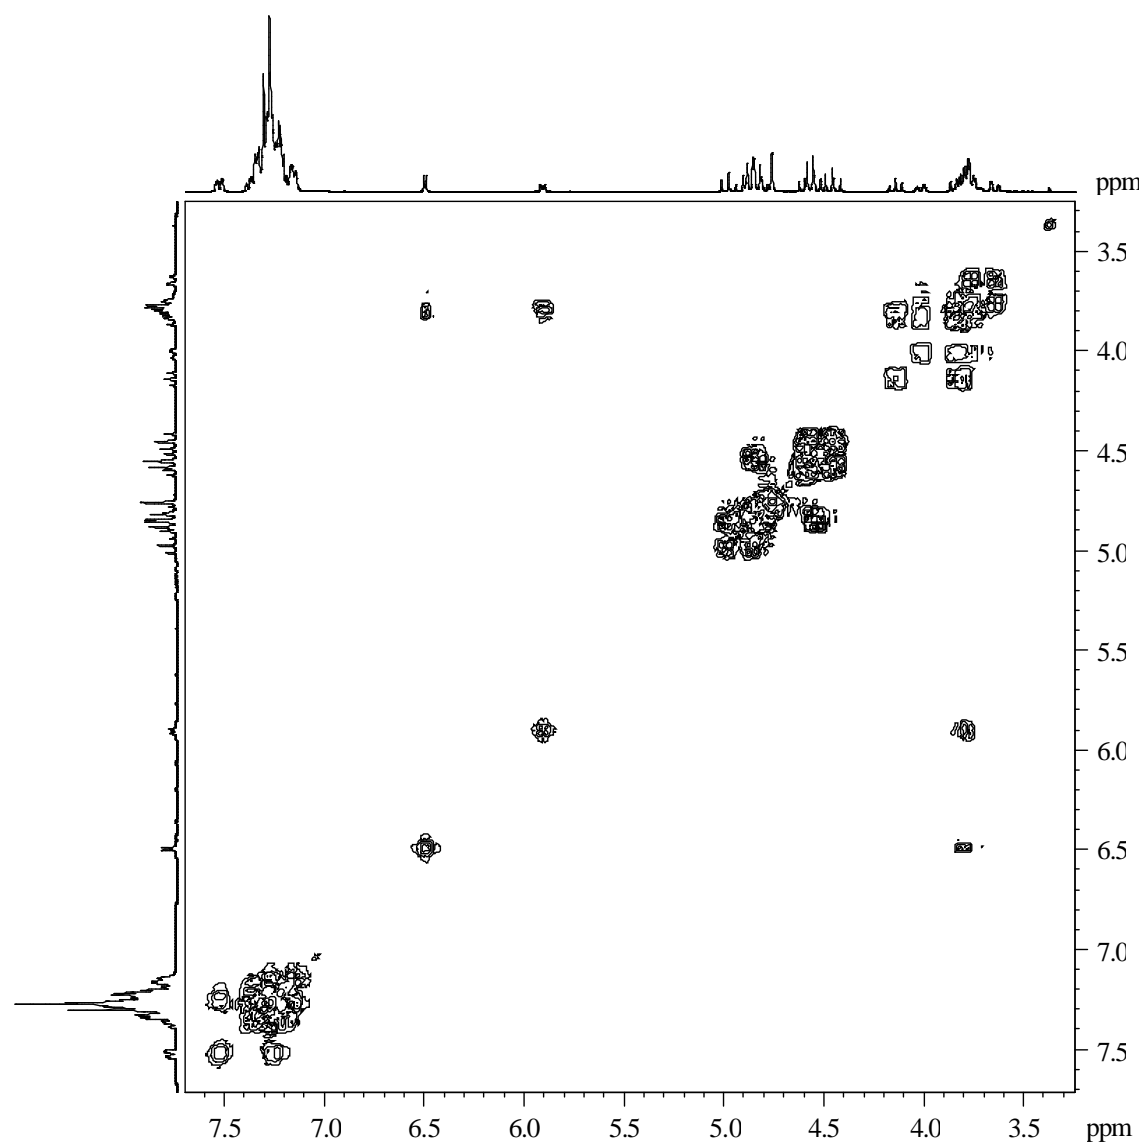

**(2D NMR 300 MHz, CDCl<sub>3</sub>)**



**Benzoxazolyl 2,3,4,6-tetra-O-benzyl-  $\alpha$ -D-mannopyranoside (6).**

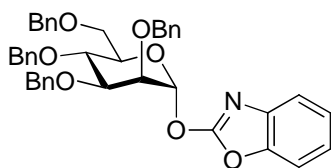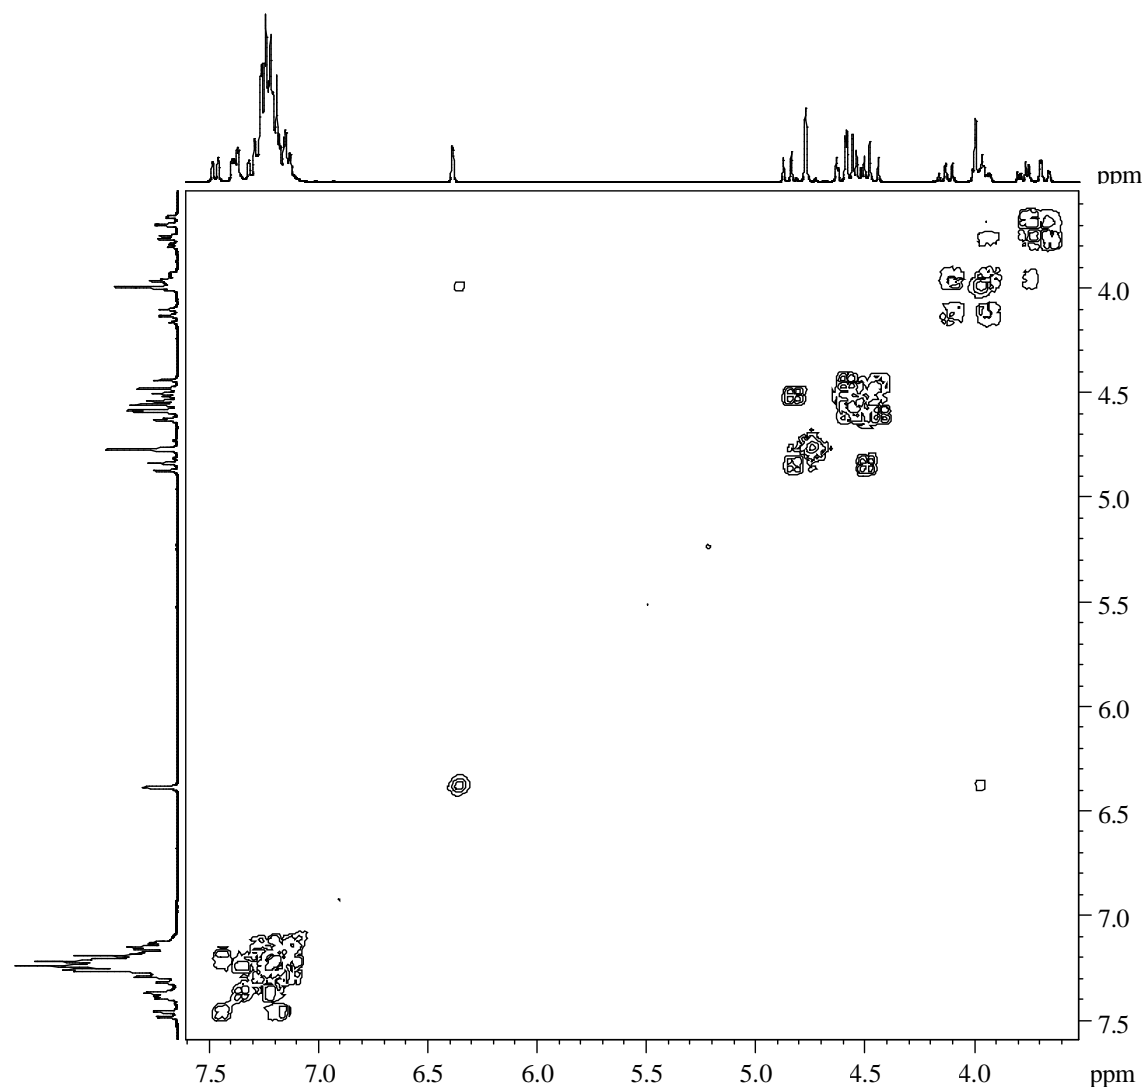

(2D NMR 300 MHz,  $\text{CDCl}_3$ )

**3,4,6-Tri-*O*-acetyl-1,2-*O*-(1-benzoxazolyloxyethylidene)-*-D*-glucopyranose (8).**

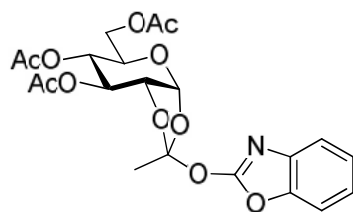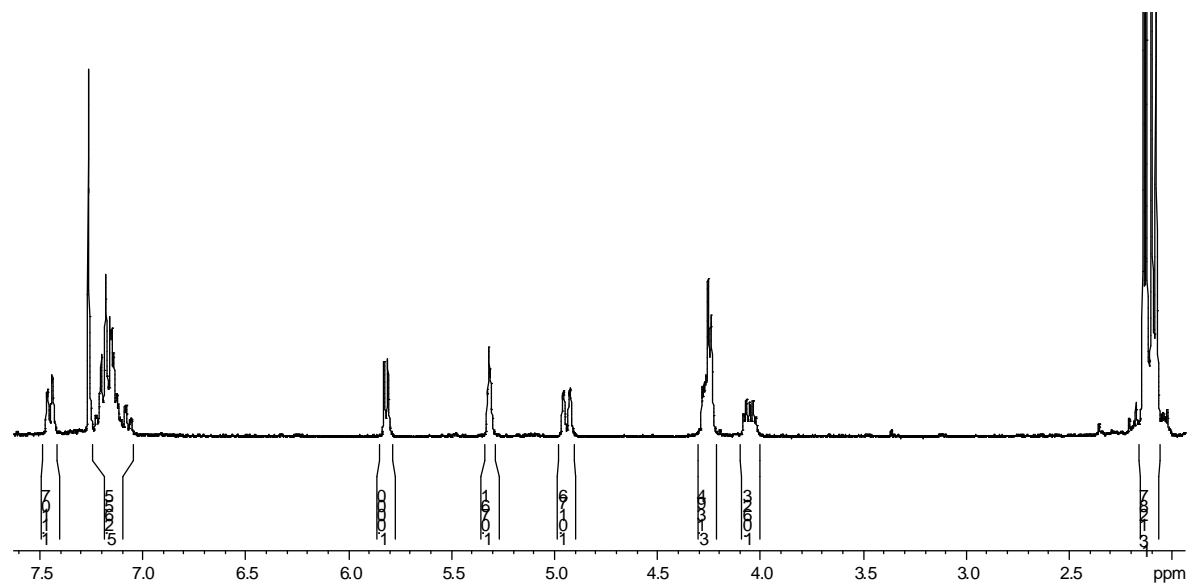

(<sup>1</sup>H NMR 300 MHz, CDCl<sub>3</sub>)

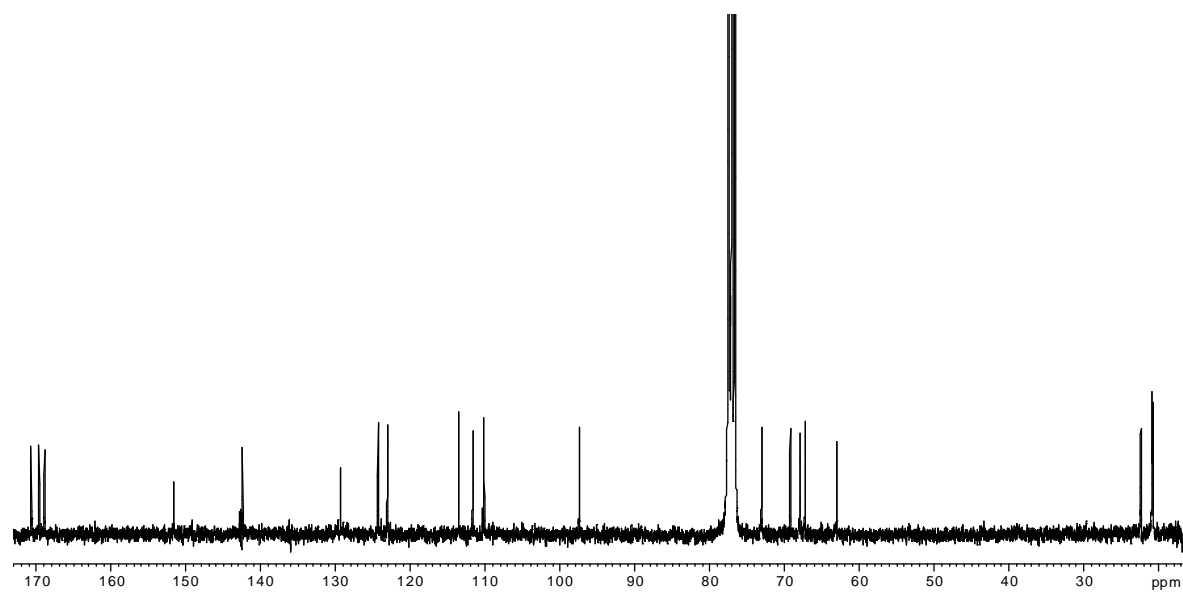

(<sup>13</sup>C NMR 75 MHz, CDCl<sub>3</sub>)

**3,4,6-Tri-*O*-acetyl-1,2-*O*-(1-benzoxazolyloxyethylidene)-  $\alpha$ -D-glucopyranose (8).**

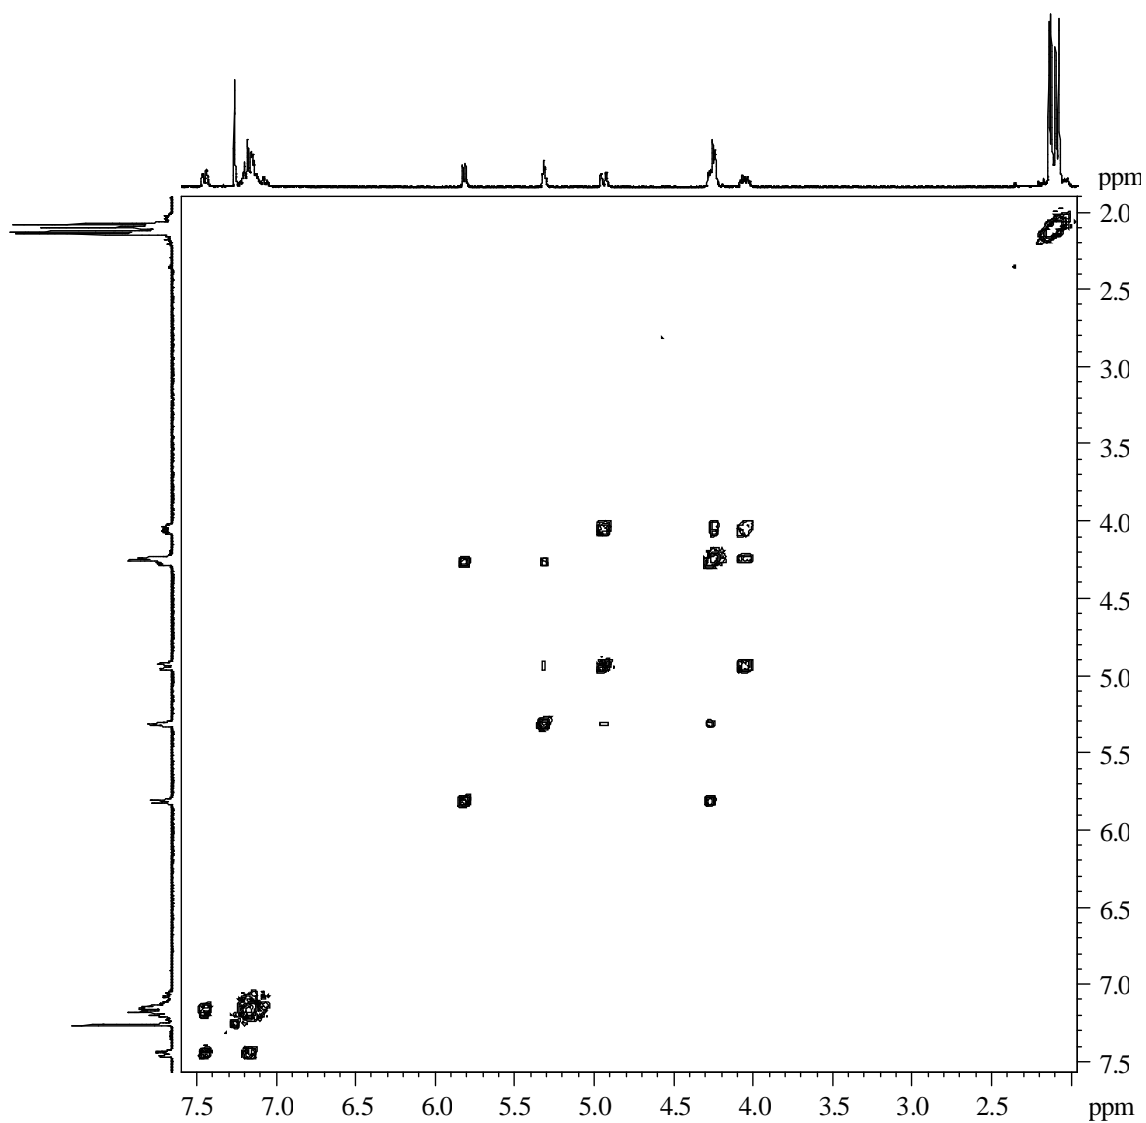

(2D NMR 300 MHz, CDCl<sub>3</sub>)

**Benzoxazolyl 2,3,4,6-tetra-O-benzoyl-  $\alpha$ -D-glucopyranoside (10).**

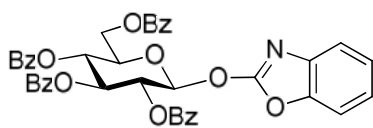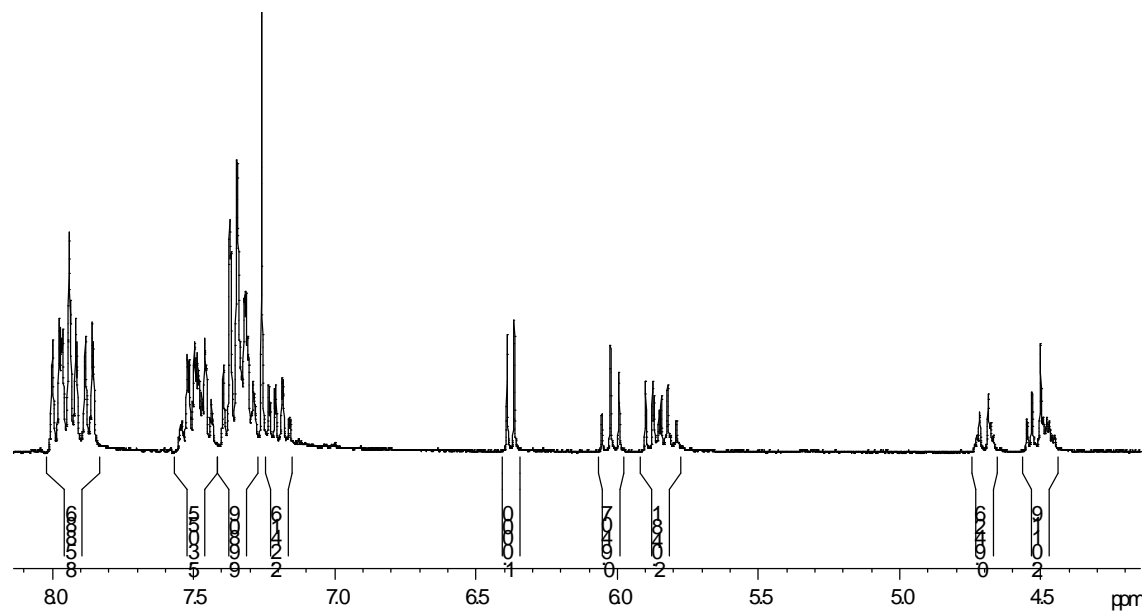

( $^1\text{H}$  NMR 300 MHz,  $\text{CDCl}_3$ )

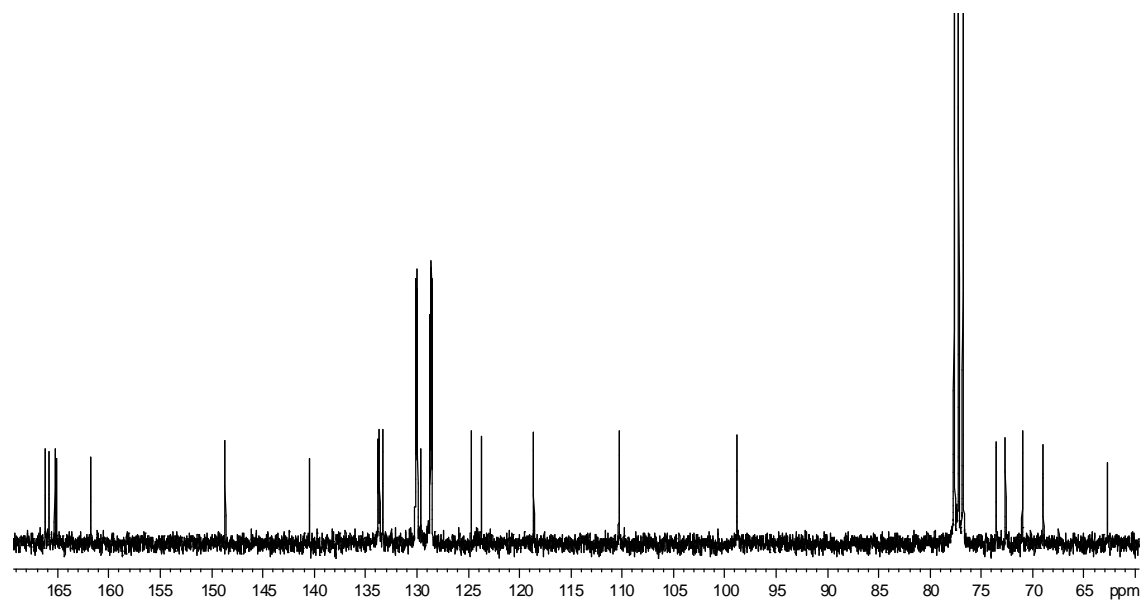

( $^{13}\text{C}$  NMR 75 MHz,  $\text{CDCl}_3$ )

**Benzoxazolyl 2,3,4,6-tetra-O-benzoyl-1-oxy- -D-glucopyranoside (10).**

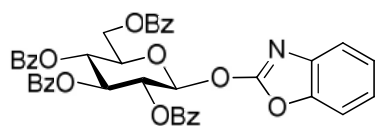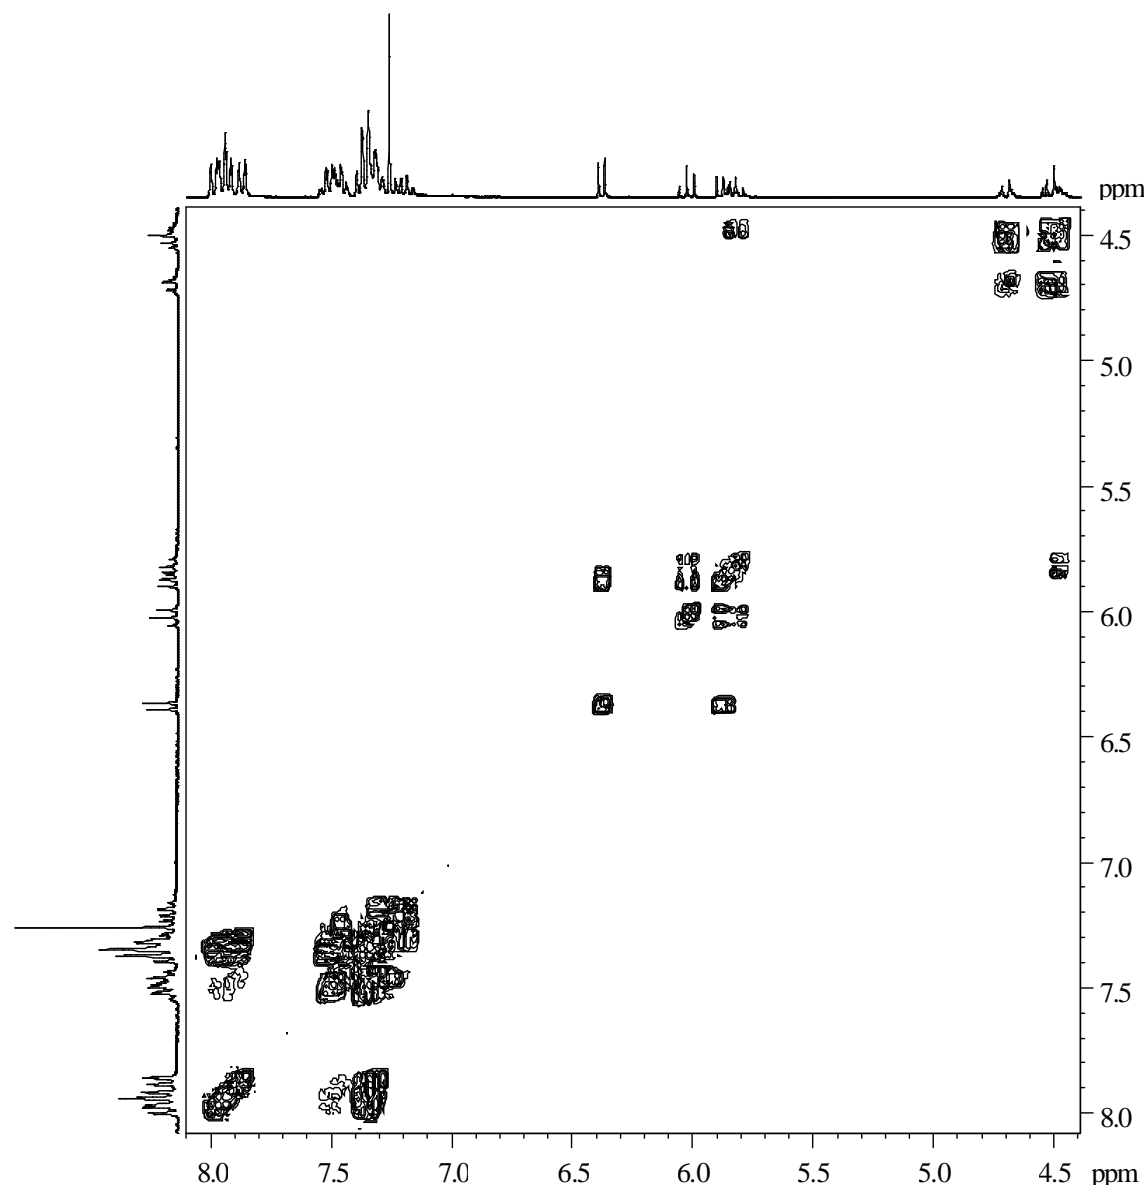

(2D NMR 300 MHz, CDCl<sub>3</sub>)

**Benzoxazolyl-2,3,4,6-tetra-O-benzoyl-  $\alpha$ -D-galactopyranoside (12).**

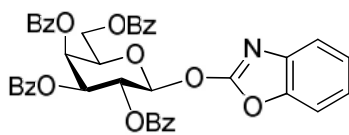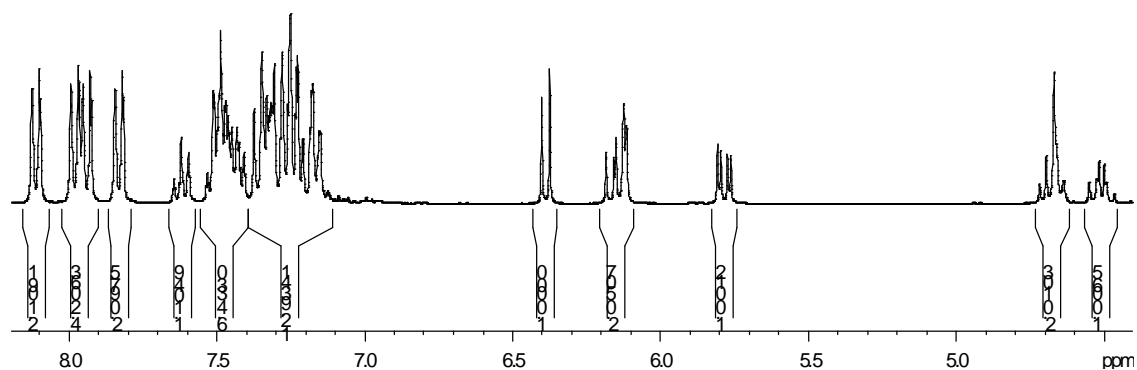

( $^1\text{H}$  NMR 300 MHz,  $\text{CDCl}_3$ )

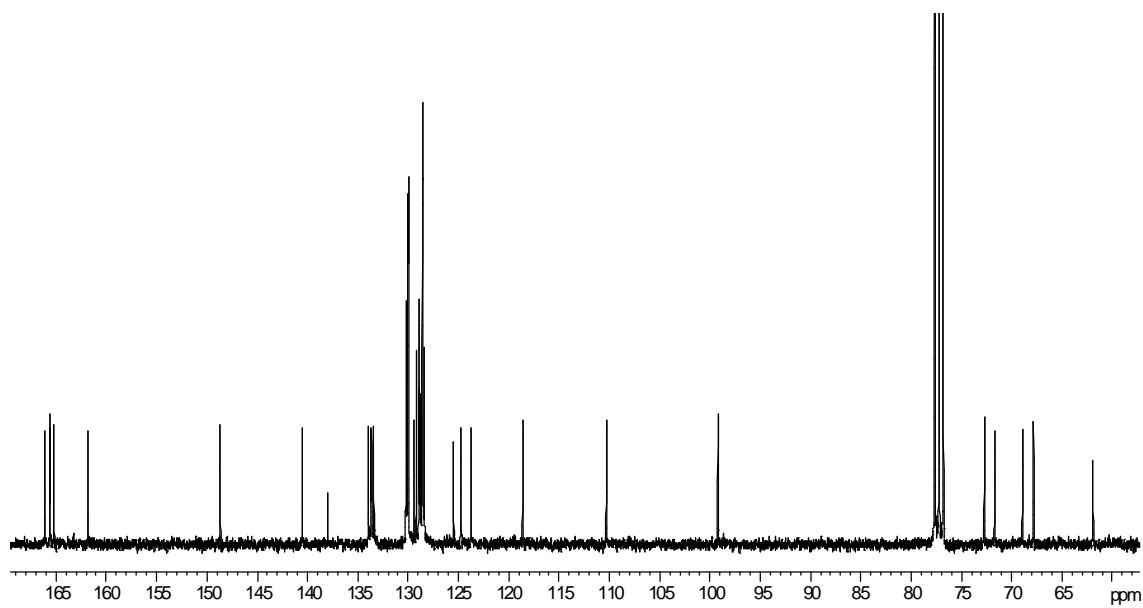

( $^{13}\text{C}$  NMR 75 MHz,  $\text{CDCl}_3$ )

**Benzoxazolyl-2,3,4,6-tetra-O-benzoyl-  $\alpha$ -D-galactopyranoside (12).**

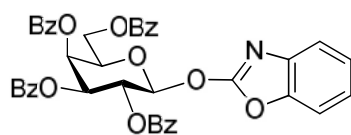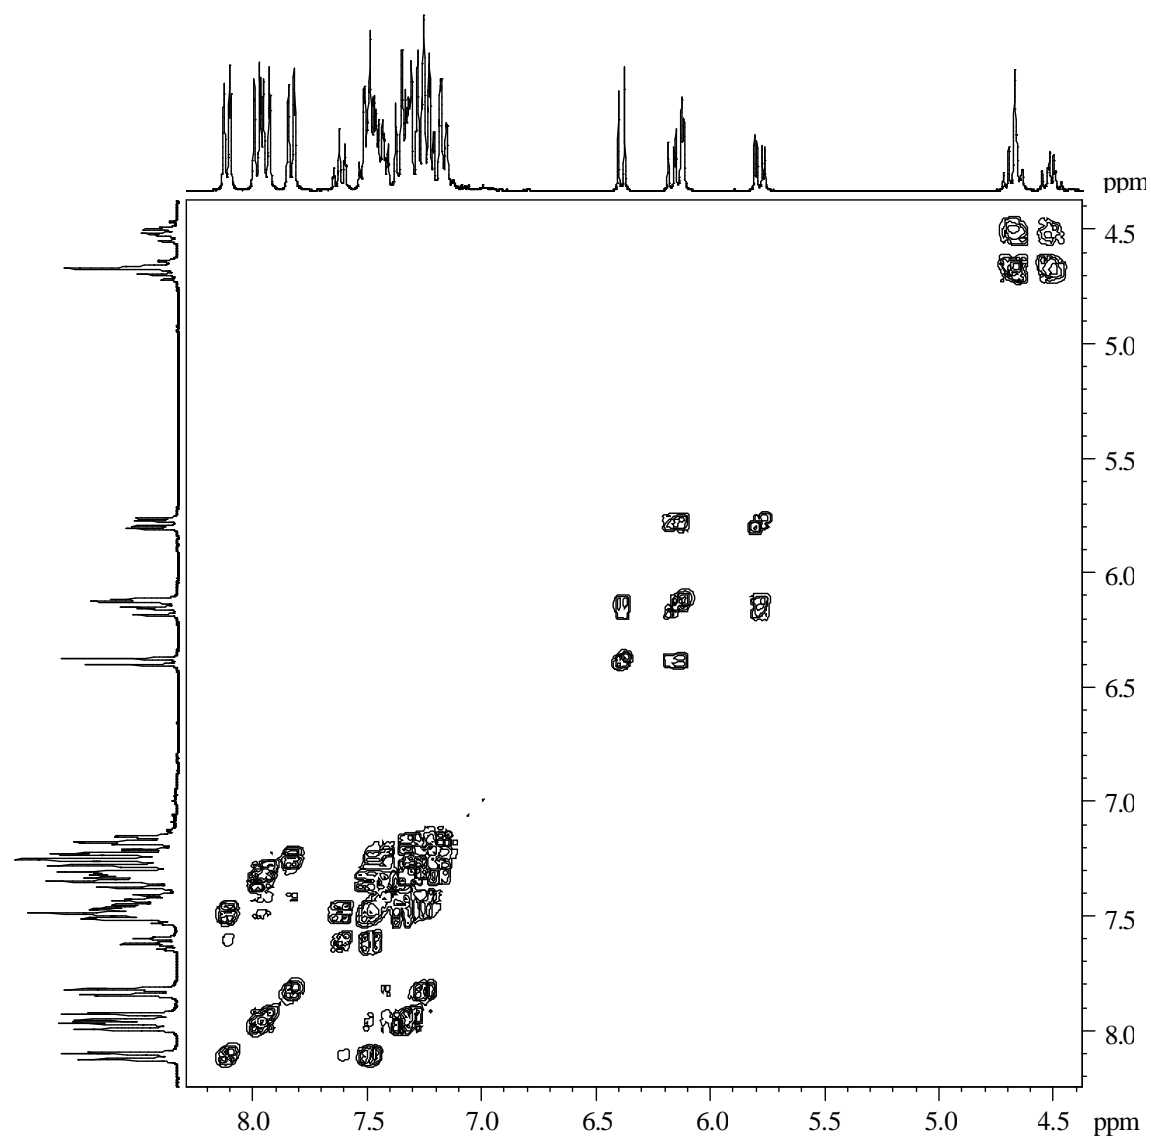

(2D NMR 300 MHz,  $\text{CDCl}_3$ )



**Benzoxazolyl 2,3,4,6-tetra-O-benzoyl-  $\alpha$ -D-mannopyranoside (14).**

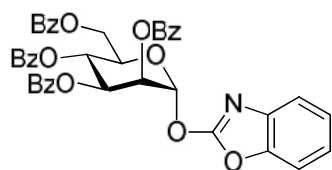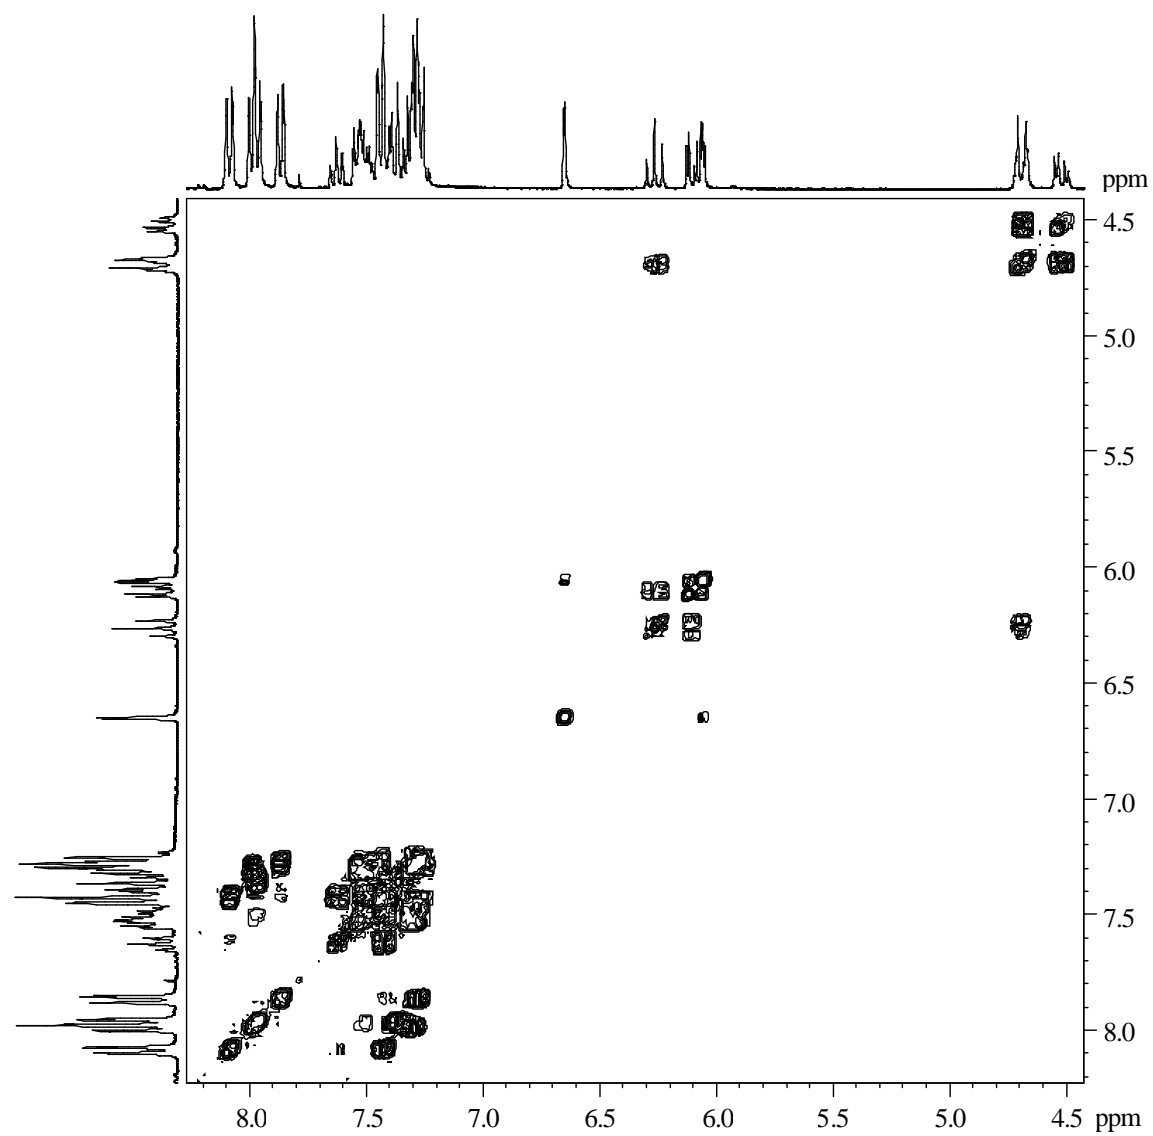

(2D NMR 300 MHz,  $\text{CDCl}_3$ )

**2,3,4,6-tetra-*O*-benzyl-  $\alpha$ -D-glucopyranosyl trichloroacetimidate (38)**

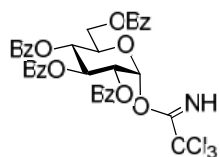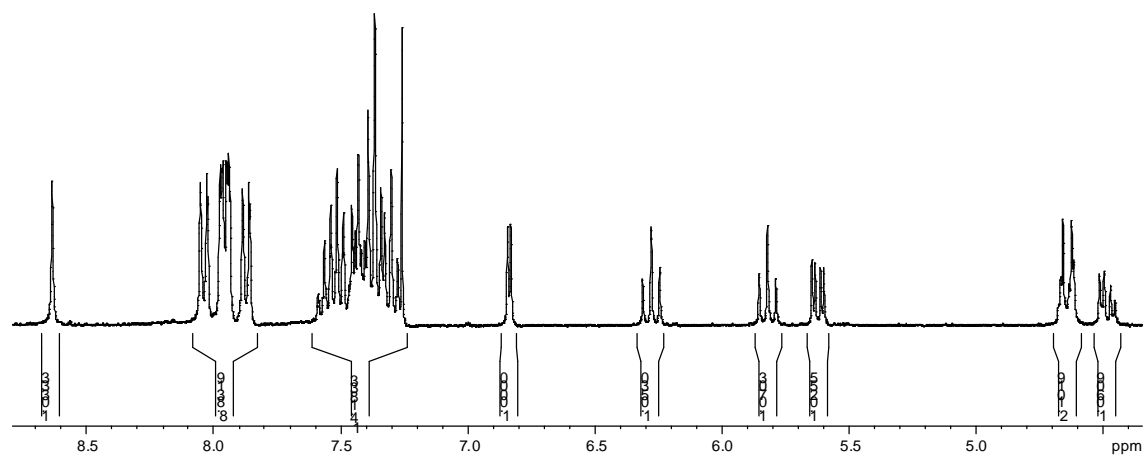

( $^1\text{H}$  NMR 300 MHz,  $\text{CDCl}_3$ )

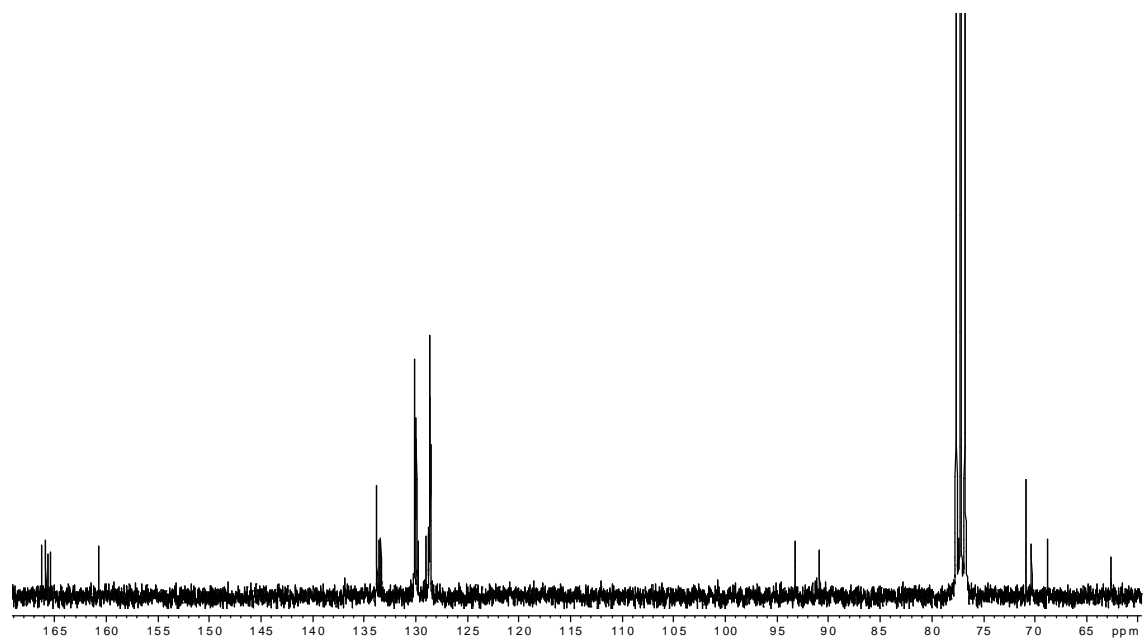

( $^{13}\text{C}$  NMR 75 MHz,  $\text{CDCl}_3$ )

**2,3,4,6-tetra-*O*-benzyl-  $\alpha$ -D-glucopyranosyl trichloroacetimidate (38)**

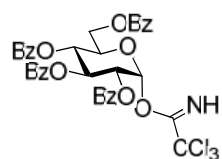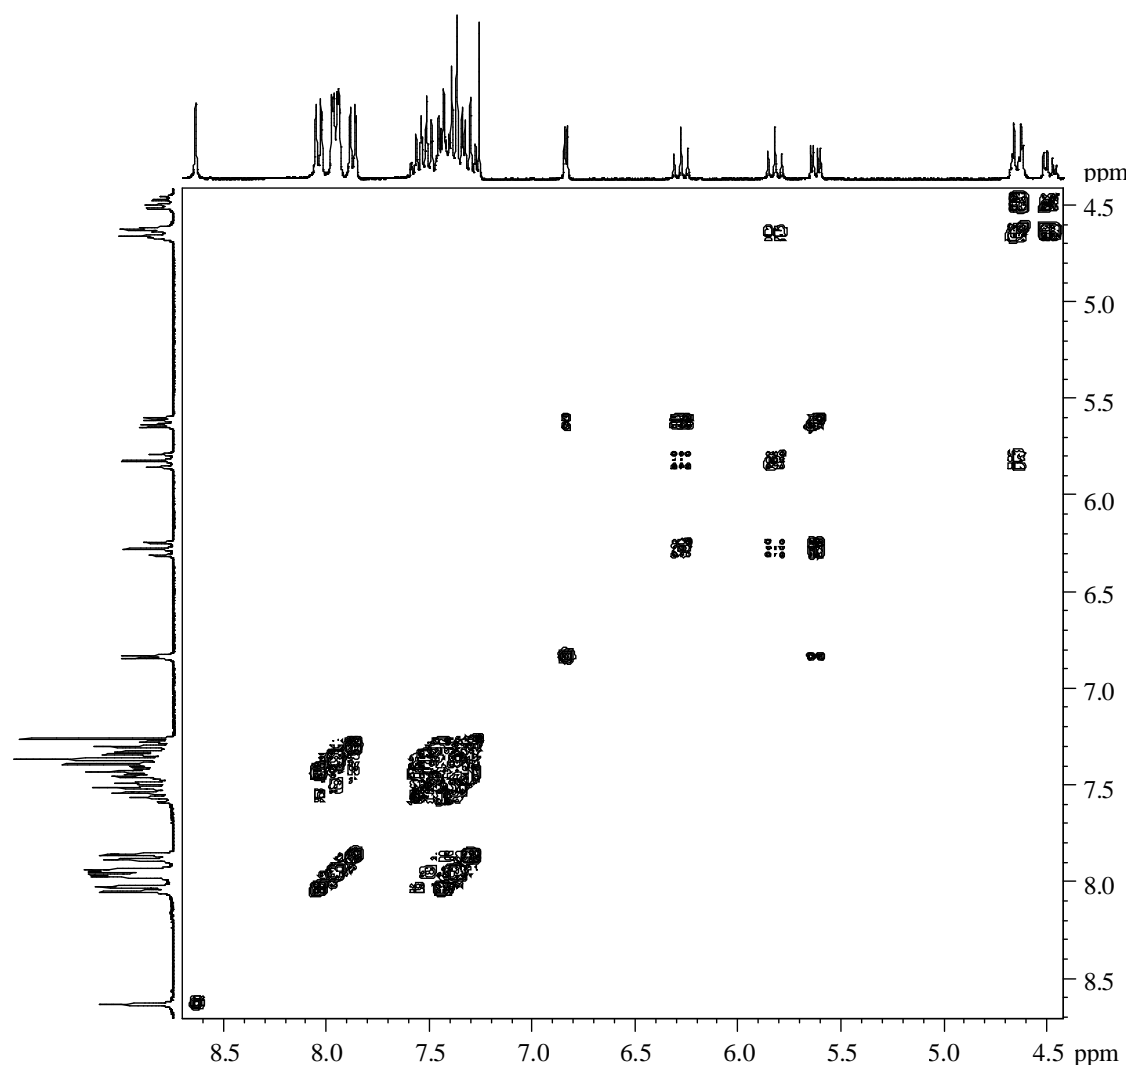

**(2D NMR 300 MHz,  $\text{CDCl}_3$ )**

**Methyl 2,3,4-tri-O-benzyl-6-O-(2,3,4,6-tetra-O-benzyl-D-mannopyranosyl)-D-glucopyranoside (23)**

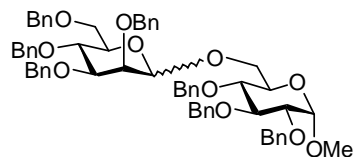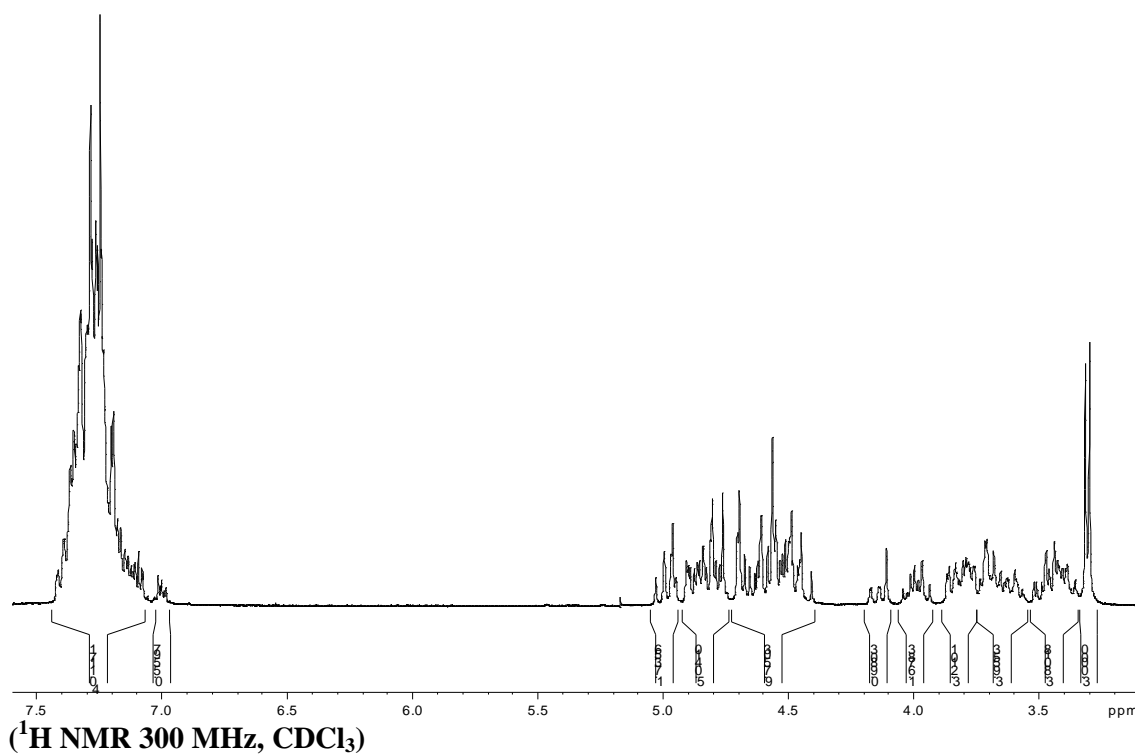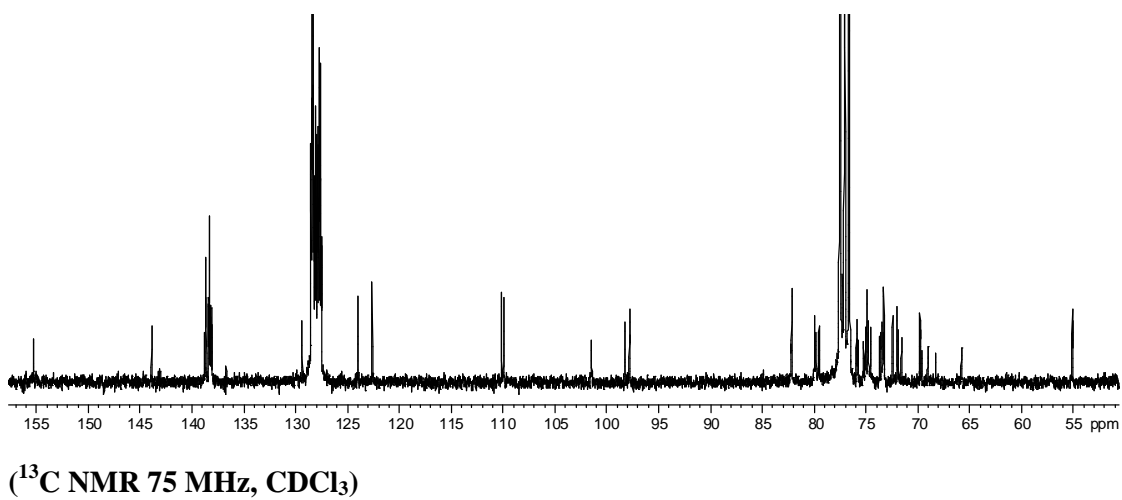

**Methyl 2,3,4-tri-O-benzyl-6-O-(2,3,4,6-tetra-O-benzyl-D-mannopyranosyl)-D-glucopyranoside (23)**

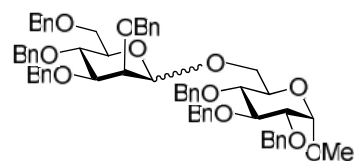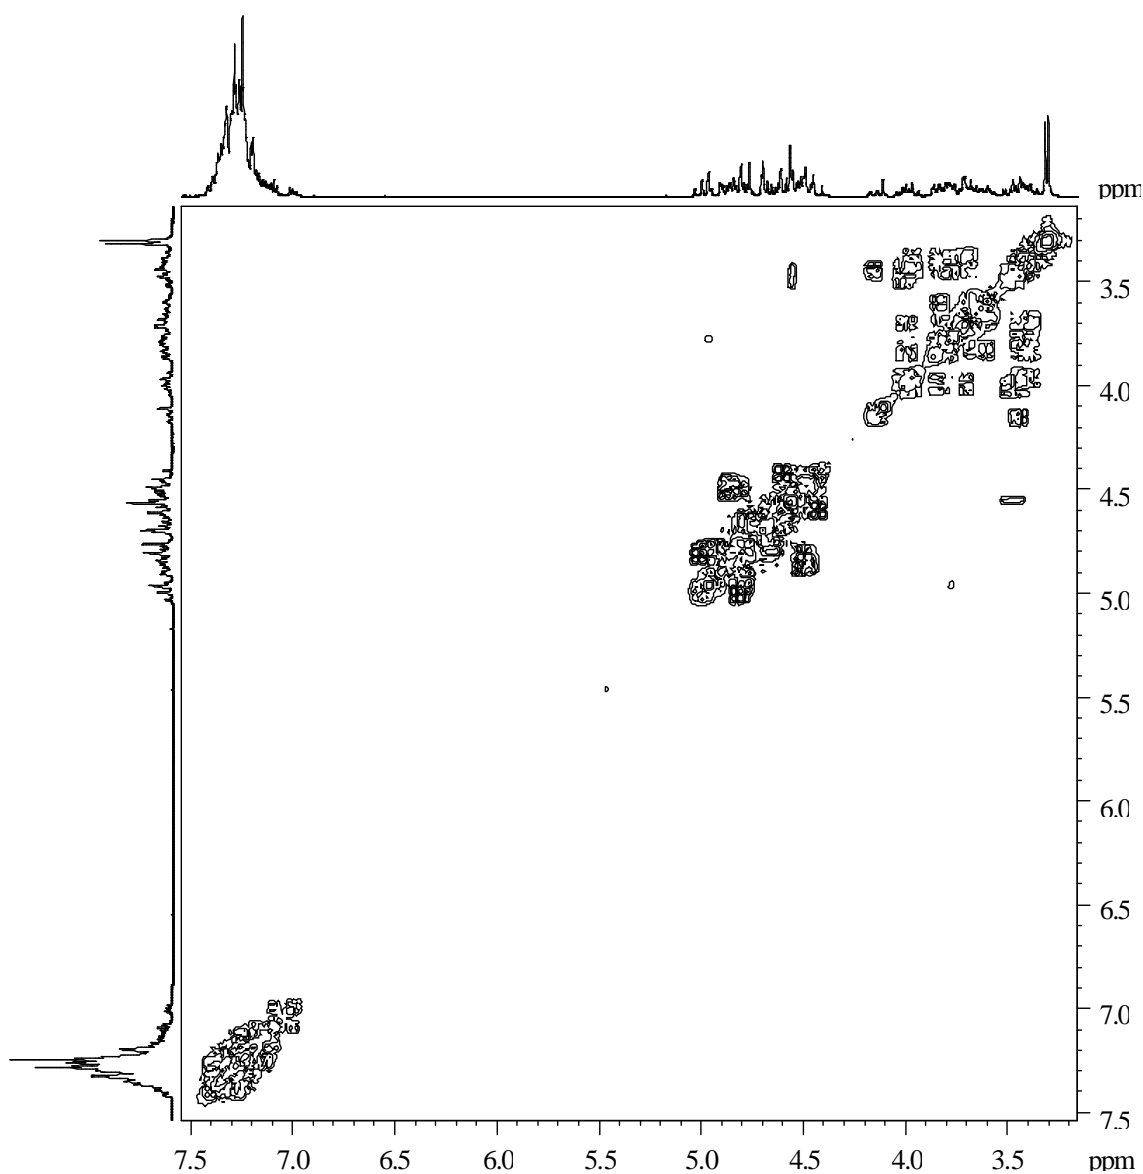

(2D NMR 300 MHz, CDCl<sub>3</sub>)

**Methyl 2,3,6-tri-O-benzyl-4-O-(2,3,4,6-tetra-O-benzyl- $\beta$ -D-mannopyranosyl)- $\beta$ -D-glucopyranoside (24)**

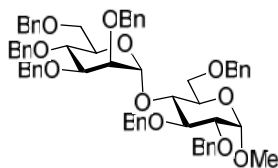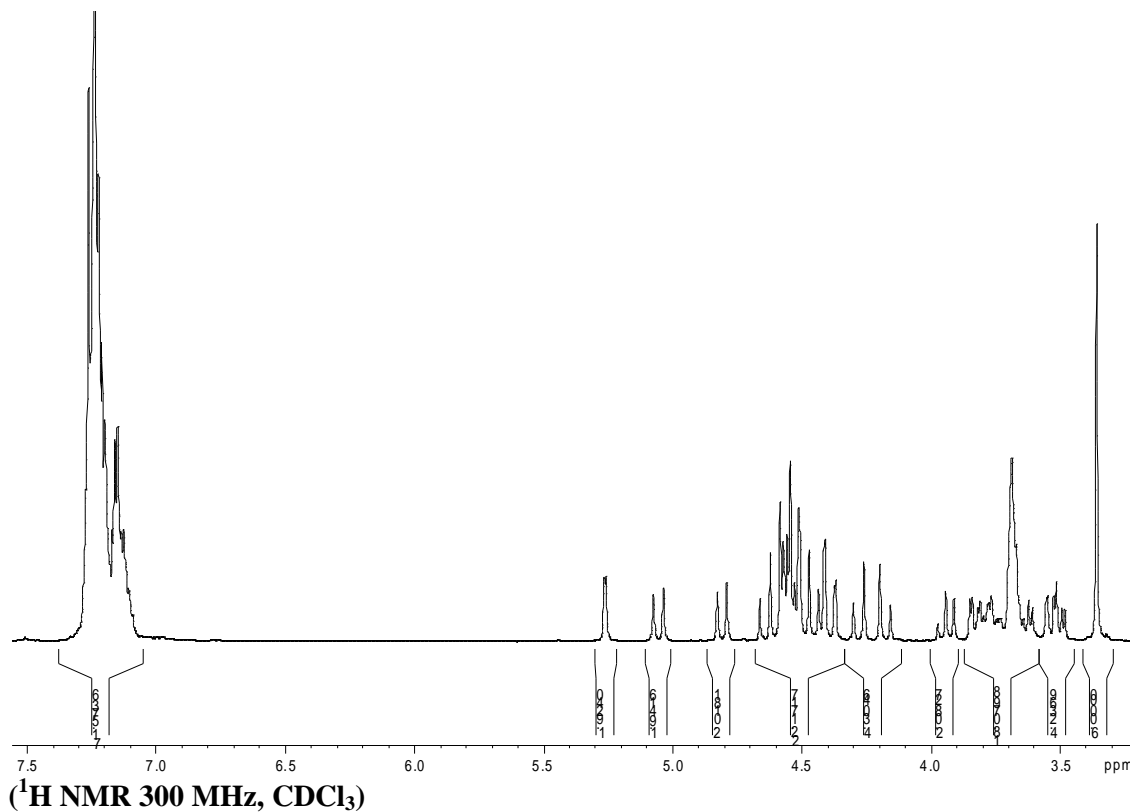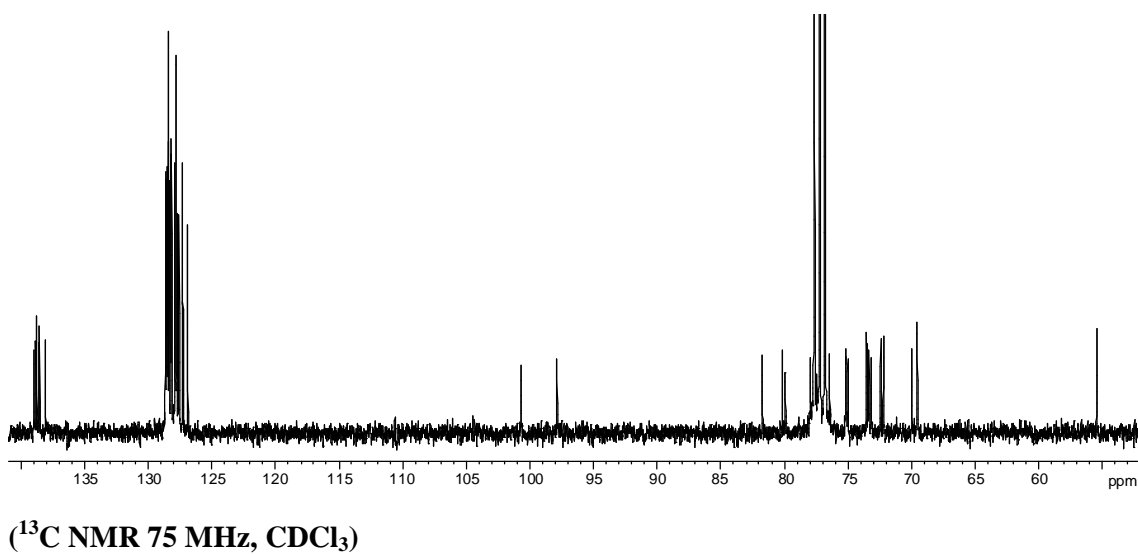

**Methyl 2,3,6-tri-O-benzyl-4-O-(2,3,4,6-tetra-O-benzyl- $\alpha$ -D-mannopyranosyl)- $\alpha$ -D-glucopyranoside (24)**

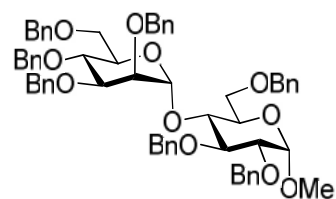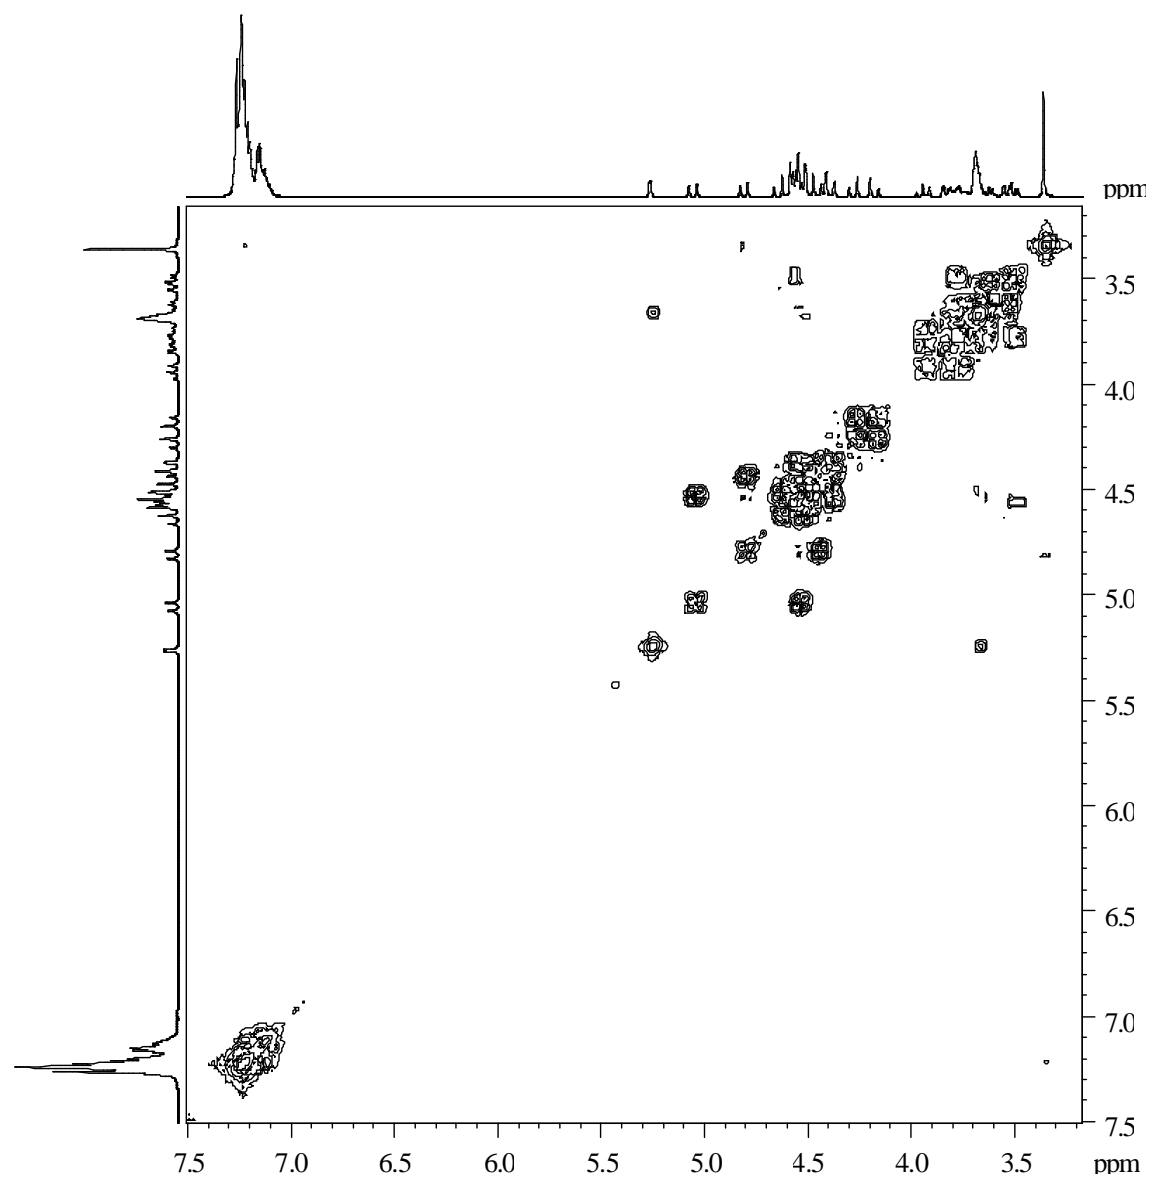

(2D NMR 300 MHz,  $\text{CDCl}_3$ )

**Methyl 2,4,6-tri-O-benzyl-3-O-(2,3,4,6-tetra-O-benzyl- $\beta$ -D-mannopyranosyl)- $\beta$ -D-glucopyranoside (25).**

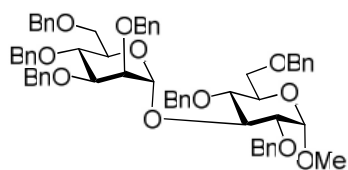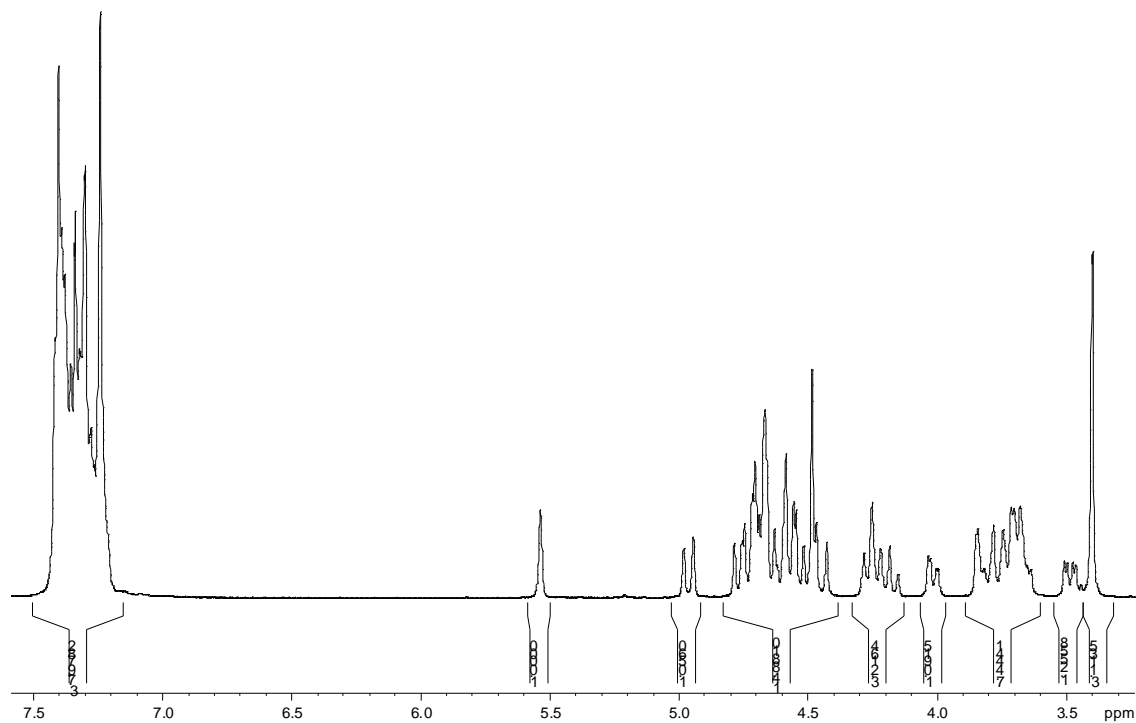

( $^1\text{H}$  NMR 300 MHz,  $\text{CDCl}_3$ )

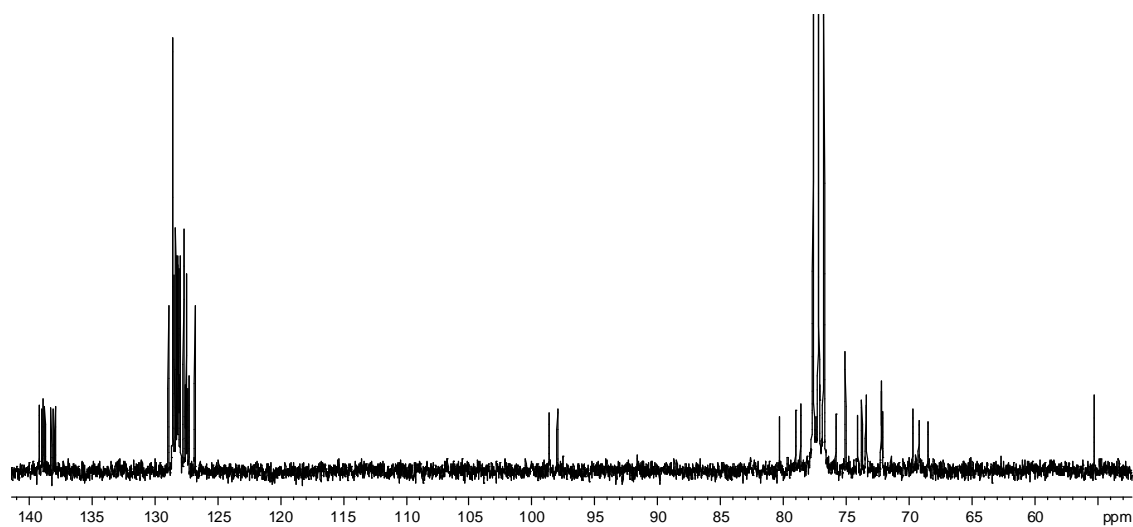

( $^{13}\text{C}$  NMR 75 MHz,  $\text{CDCl}_3$ )

**Methyl 2,4,6-tri-O-benzyl-3-O-(2,3,4,6-tetra-O-benzyl- $\alpha$ -D-mannopyranosyl)- $\alpha$ -D-glucopyranoside (25).**

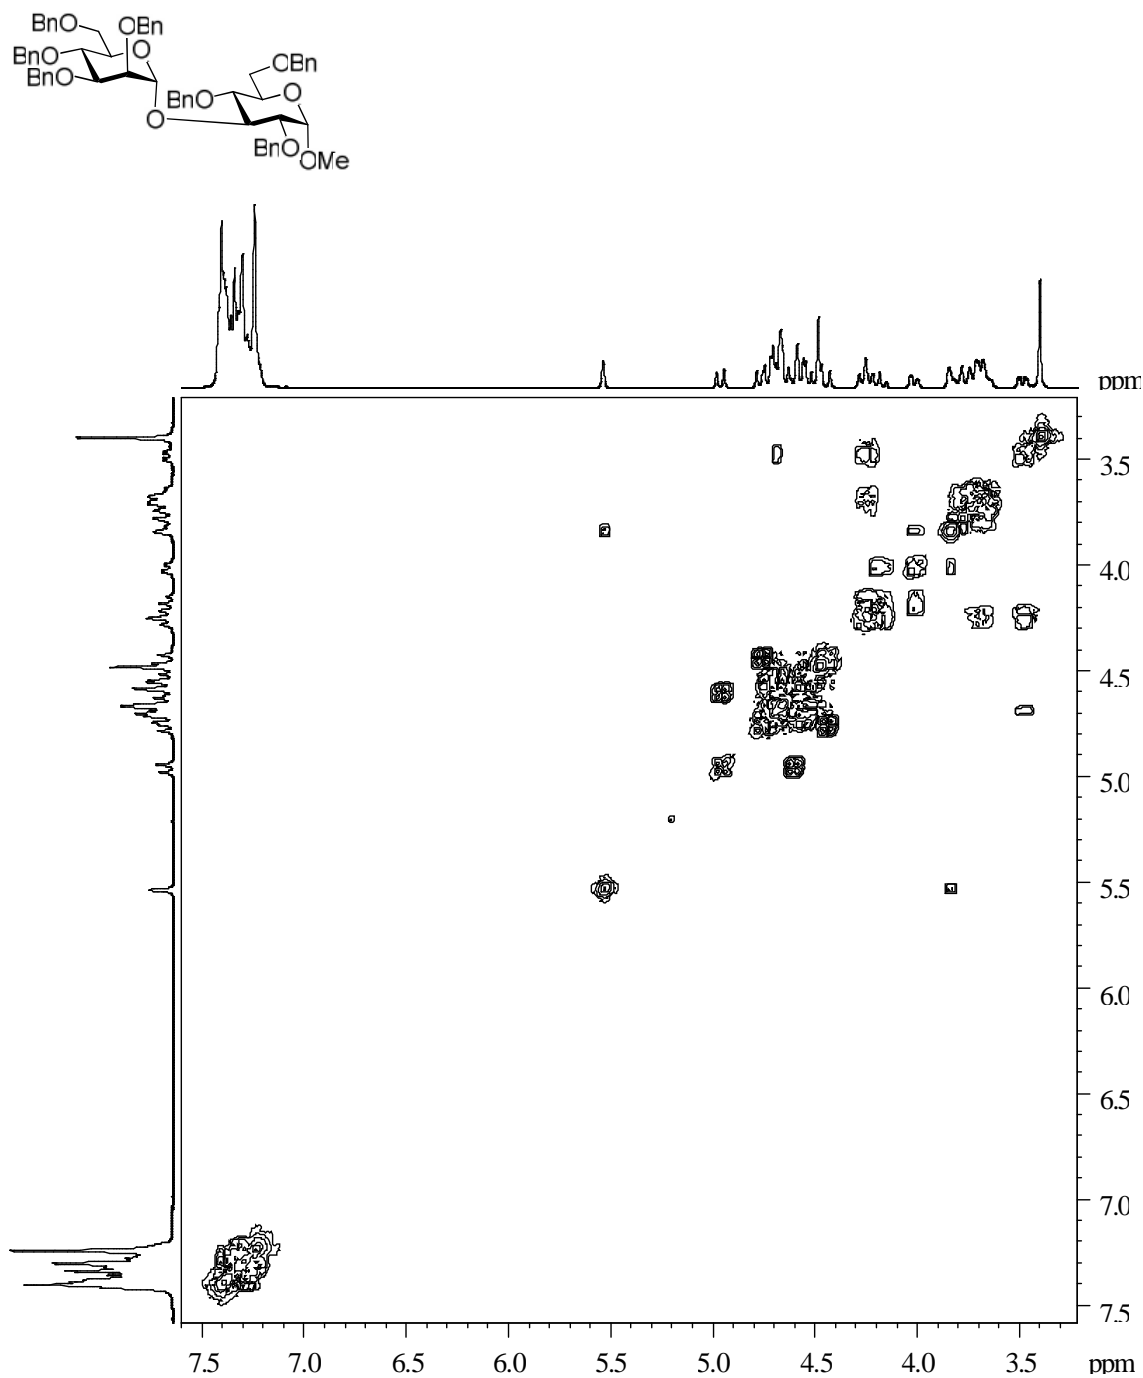

(2D NMR 300 MHz,  $\text{CDCl}_3$ )

**Methyl 3,4,6-tri-O-benzyl-2-O-(2,3,4,6-tetra-O-benzyl- $\beta$ -D-mannopyranosyl)- $\beta$ -D-glucopyranoside (26)**

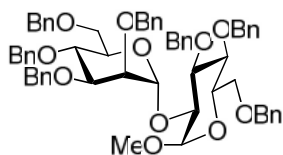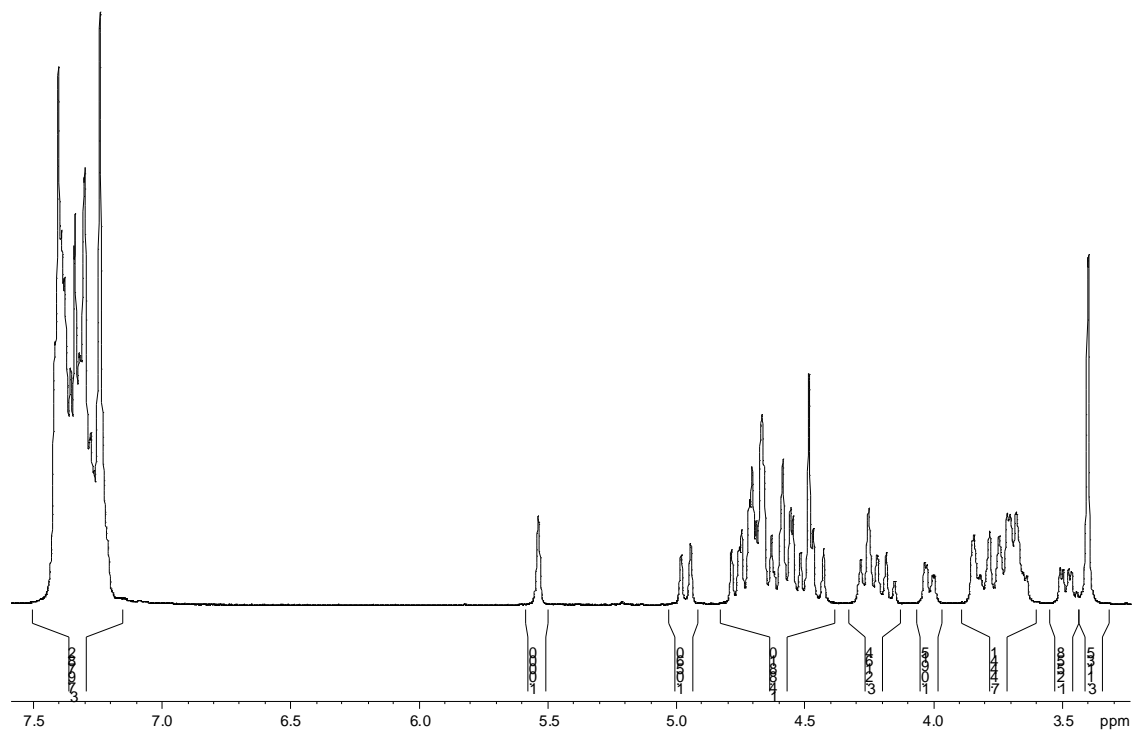

( $^1\text{H}$  NMR 300 MHz,  $\text{CDCl}_3$ )

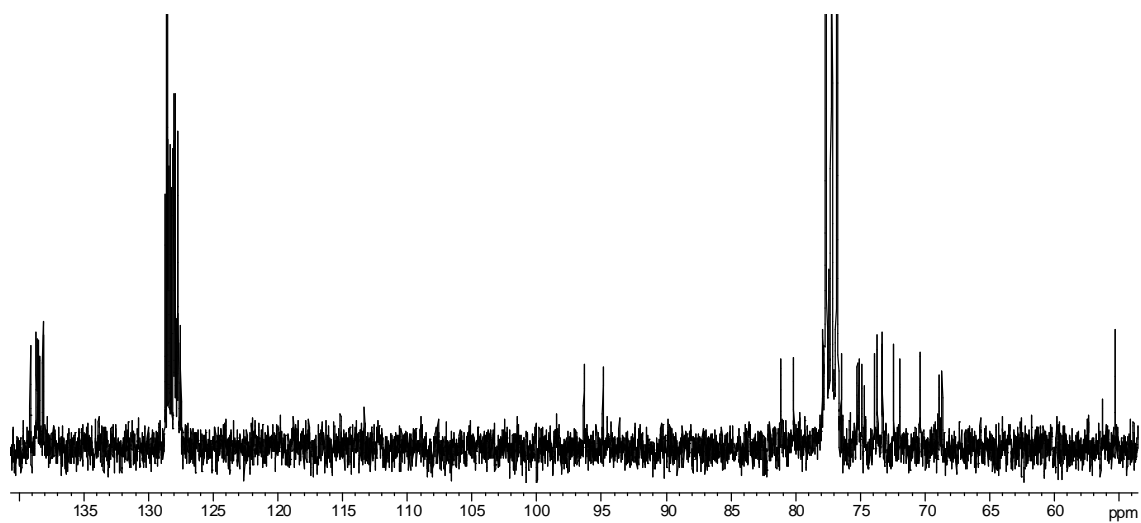

( $^{13}\text{C}$  NMR 75 MHz,  $\text{CDCl}_3$ )

**Methyl 3,4,6-tri-O-benzyl-2-O-(2,3,4,6-tetra-O-benzyl- $\beta$ -D-mannopyranosyl)- $\beta$ -D-glucopyranoside (26)**

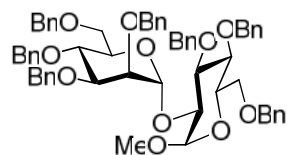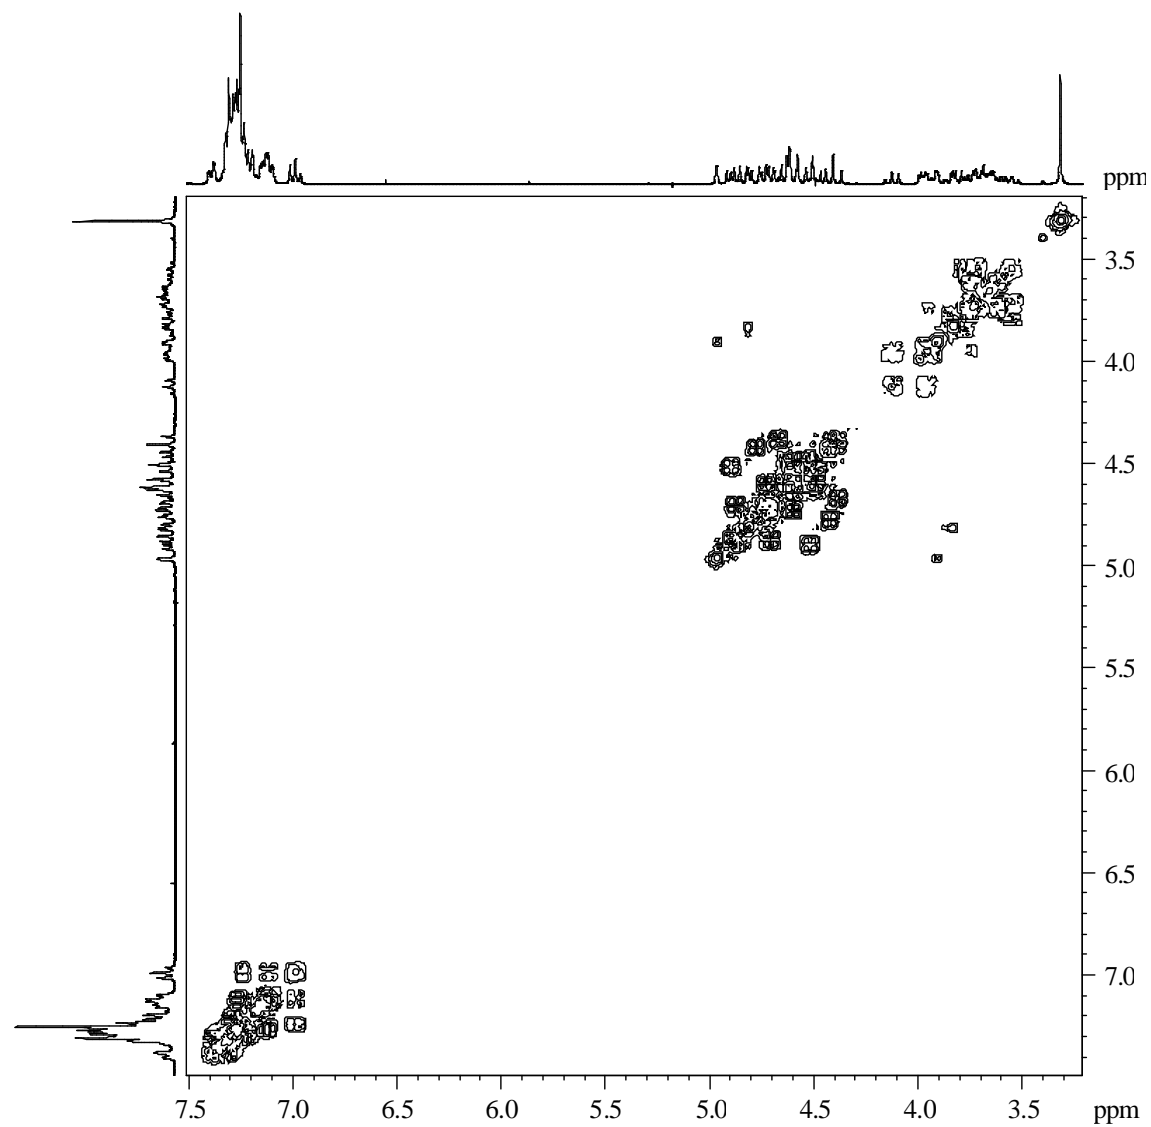

(2D NMR 300 MHz,  $\text{CDCl}_3$ )

## References

1. H. Zinner and K. Peseke, *Chem. Ber.*, 1965, 98, 3515-3519.
2. M. N. Kamat, N. P. Rath and A. V. Demchenko, *J. Org. Chem.*, 2007, 72, 6938-6946.
3. R. Eby and C. Schuerch, *Carbohydr. Res.*, 1975, 39, 33-38.
4. J. R. Pougny, M. A. M. Nassr, N. Naulet and P. Sinay, *Nouveau J. Chem.*, 1978, 2, 389-395.
5. H. Chiba, S. Funasaka and T. Mukaiyama, *Bull. Chem. Soc. Jpn.*, 2003, 76, 1629-1644.
6. Y. Ito, T. Ogawa, M. Numata and M. Sugimoto, *Carbohydr. Res.*, 1990, 202, 165-175.
7. S. Hotha and S. Kashyap, *J. Am. Chem. Soc.*, 2006, 128, 9620-9621.
8. H. M. Nguyen, Y. N. Chen, S. G. Duron and D. Y. Gin, *J. Am. Chem. Soc.*, 2001, 123, 8766-8772.
9. K. Jayakanthan and Y. D. Vankar, *Carbohydr. Res.*, 2005, 340, 2688-2692.
10. D.-C. Xiong, L.-H. Zhang and X.-S. Ye, *Adv. Synth. Catal.*, 2008, 350, 1696-1700.
11. B. A. Garcia and D. Y. Gin, *J. Am. Chem. Soc.*, 2000, 122, 4269-4279.
12. S. C. Ranade, S. Kaeothip and A. V. Demchenko, *Org. Lett.*, 2010, 12, 5628-5631.
13. P. Pornsuriyasak and A. V. Demchenko, *Chem. Eur. J.*, 2006, 12, 6630-6646.
14. J. D. C. Codee, L. J. Van den Bos, R. E. J. N. Litjens, H. S. Overkleeft, C. A. A. Van Boeckel, J. H. Van Boom and G. A. Van der Marel, *Tetrahedron*, 2004, 60, 1057-1064.
15. S. Brennan and P. A. Finan, *J. Chem. Soc., C*, 1970, 1742-1744.
